1     **Dynamic regulation of chromatin accessibility by pluripotency transcription factors**  
2                                    **across the cell cycle**

3  
4     Elias T. Friman<sup>1</sup>, Cédric Deluz<sup>1</sup>, Antonio C.A. Meireles-Filho<sup>1</sup>, Subashika Govindan<sup>1</sup>,  
5     Vincent Gardeux<sup>1</sup>, Bart Deplancke<sup>1</sup>, David M. Suter<sup>1</sup>

6  
7     Corresponding author: david.suter@epfl.ch

8  
9     **Affiliations**

10    <sup>1</sup>Institute of Bioengineering, School of Life Sciences, Ecole Polytechnique Fédérale de  
11    Lausanne (EPFL), CH-1015 Lausanne, Switzerland

12  
13    **Abstract**

14    The pioneer activity of transcription factors allows for opening of inaccessible regulatory  
15    elements and has been extensively studied in the context of cellular differentiation and  
16    reprogramming. In contrast, the function of pioneer activity in self-renewing cell divisions  
17    and across the cell cycle is poorly understood. Here we assessed the interplay between  
18    OCT4 and SOX2 in controlling chromatin accessibility of mouse embryonic stem cells. We  
19    found that OCT4 and SOX2 operate in a largely independent manner even at co-occupied  
20    sites, and that their cooperative binding is mostly mediated indirectly through regulation of  
21    chromatin accessibility. Controlled protein degradation strategies revealed that the  
22    uninterrupted presence of OCT4 is required for post-mitotic re-establishment and  
23    interphase maintenance of chromatin accessibility, and that highly OCT4-bound enhancers  
24    are particularly vulnerable to transient loss of OCT4 expression. Our study sheds light on  
25    the constant pioneer activity required to maintain the dynamic pluripotency regulatory  
26    landscape in an accessible state.

27

28

## 29 **Introduction**

30 Transcription factors (TFs) regulate the expression of genes through interactions with  
31 specific DNA sequences located in gene promoters and distal regulatory elements. A  
32 minority of TFs display pioneer activity, i.e. they have the ability to bind and induce the  
33 opening of nucleosome-occupied chromatin regions, allowing for the subsequent binding of  
34 other TFs and co-factors required for transcriptional activation (Cirillo et al., 2002;  
35 Schaffner, 2015; Zaret and Carroll, 2011). Pioneer TFs thereby play a central role in  
36 developmental and reprogramming cell fate decisions, which hinge on large-scale  
37 reshaping of the chromatin landscape in tissue-specific regulatory regions (Chronis et al.,  
38 2017; Iwafuchi-Doi and Zaret, 2014; Jacobs et al., 2018; Mayran et al., 2018; Pastor et al.,  
39 2018; Soufi et al., 2015, 2012; Takaku et al., 2016). Much less is known about the role of  
40 pioneer activity and of its dynamics over the cell cycle in regulating stem cell self-renewal.  
41 The OCT4 (also known as POU5F1) and SOX2 pioneer TFs (Soufi et al., 2015) are  
42 absolutely required for the self-renewal of embryonic stem (ES) cells (Masui et al., 2007;  
43 Niwa et al., 2000). OCT4 and SOX2 can form a heterodimer that binds to a composite motif  
44 at thousands of sites in the genome (Boyer et al., 2005; Nishimoto et al., 1999; Yuan et al.,  
45 1995). A recent study has shown that depletion of OCT4 for 24 hours in ES cells leads to  
46 loss of accessibility and co-factor occupancy at a large fraction of its bound enhancers  
47 involved in pluripotency maintenance (King and Klose, 2017). In contrast, the role of SOX2  
48 in the regulation of ES cell chromatin accessibility has not been elucidated. Thus, to which  
49 extent the pioneering activities of OCT4 and SOX2 overlap and/or depend on each other to  
50 regulate chromatin accessibility in ES cells is unclear.

51 Self-renewal requires the ability to progress through the cell cycle without losing cell type-  
52 specific gene expression. This is not a trivial task since chromatin accessibility of gene  
53 regulatory elements is markedly decreased during S phase and mitosis (Festuccia et al.,  
54 2019; Hsiung et al., 2015; Oomen et al., 2019; Stewart-Morgan et al., 2019). How recovery  
55 of chromatin accessibility after DNA replication and mitosis is controlled, and whether it  
56 requires pioneer activity is poorly understood. The period of genome reactivation occurring

57 at the mitosis-G1 (M-G1) transition coincides with a particularly favorable context for  
58 reprogramming by somatic cell nuclear transfer (mitosis) (Egli et al., 2008) and increased  
59 sensitivity to differentiation signals in human ES cells (G1 phase) (Pauklin and Vallier,  
60 2013). Recent evidence also points at cell cycle stage-specific functions of OCT4 and  
61 SOX2 in cell fate regulation. OCT4 expression levels in G1 phase affect the propensity of  
62 ES cells to differentiate towards neuroectoderm and mesendoderm (Strebinger et al.,  
63 2019), and depletion of OCT4 at the M-G1 transition impairs pluripotency maintenance of  
64 ES cells and leads to a lower reprogramming efficiency upon overexpression in mouse  
65 embryonic fibroblasts (Liu et al., 2017). Depletion of SOX2 at the M-G1 transition impairs  
66 both pluripotency maintenance and SOX2-induced neuroectodermal differentiation of ES  
67 cells upon release of pluripotency signals (Deluz et al., 2016). Whether the particular  
68 sensitivity of M and G1 phases to the action of OCT4 and SOX2 is related to the dynamics  
69 of their pioneer activity across the cell cycle is unknown.

70 Here we studied the interplay of OCT4 and SOX2 in regulating chromatin accessibility of  
71 ES cells and dissected the pioneer activity of OCT4 across the cell cycle. We show that  
72 most enhancers bound by both TFs depend on only one of them to maintain their open  
73 chromatin state, and that cooperative binding of OCT4 and SOX2 is mainly mediated  
74 indirectly through changes in chromatin accessibility. Using forms of OCT4 engineered for  
75 mitotic or auxin-inducible degradation, we demonstrate the role of OCT4 in re-  
76 establishment and continuous maintenance of chromatin accessibility throughout the cell  
77 cycle.

78

79

## 80 **Results**

### 81 **OCT4 and SOX2 regulate chromatin accessibility at mostly distinct loci**

82 OCT4 and SOX2 bind cooperatively to thousands of genomic locations in ES cells both  
83 independently and as a heterodimer on a composite OCT4::SOX2 motif. How OCT4 and  
84 SOX2 interplay to regulate chromatin accessibility in ES cells is not known. To address this  
85 question, we decided to determine genome-wide chromatin accessibility changes upon  
86 acute loss of OCT4 or SOX2. To deplete OCT4 and SOX2 from ES cells in an inducible  
87 manner, we took advantage of the ZHBTc4 (Niwa et al., 2000) and 2TS22C (Masui et al.,  
88 2007) mouse ES cell lines, in which a Tet-Off promoter regulates the expression of *Oct4*  
89 and *Sox2*, respectively (Fig. 1A). While OCT4 is fully depleted after 24 hours of doxycycline  
90 (dox) (Niwa et al., 2000), SOX2 is not, likely due to its longer half-life (Masui et al., 2007).  
91 We determined SOX2 levels by immunofluorescence staining after 26 and 40 hours of dox  
92 treatment and found that residual SOX2 expression persisted after 26 hours but not 40  
93 hours of dox treatment (Fig. S1A). Importantly, despite its known role in regulating  
94 expression of OCT4 (Dunn et al., 2014; Strebinger et al., 2019), SOX2 depletion for 26 or  
95 40 hours had only a minor impact on OCT4 levels (Fig. S1A-B). In ZHBTc4 cells, as  
96 expected 24 hours of dox treatment led to the complete depletion of OCT4 and only mildly  
97 affected SOX2 levels (Fig. S1C-D). Therefore, changes in chromatin accessibility upon  
98 short-term SOX2 or OCT4 loss are unlikely to be confounded by changes in expression  
99 levels of OCT4 and SOX2, respectively.

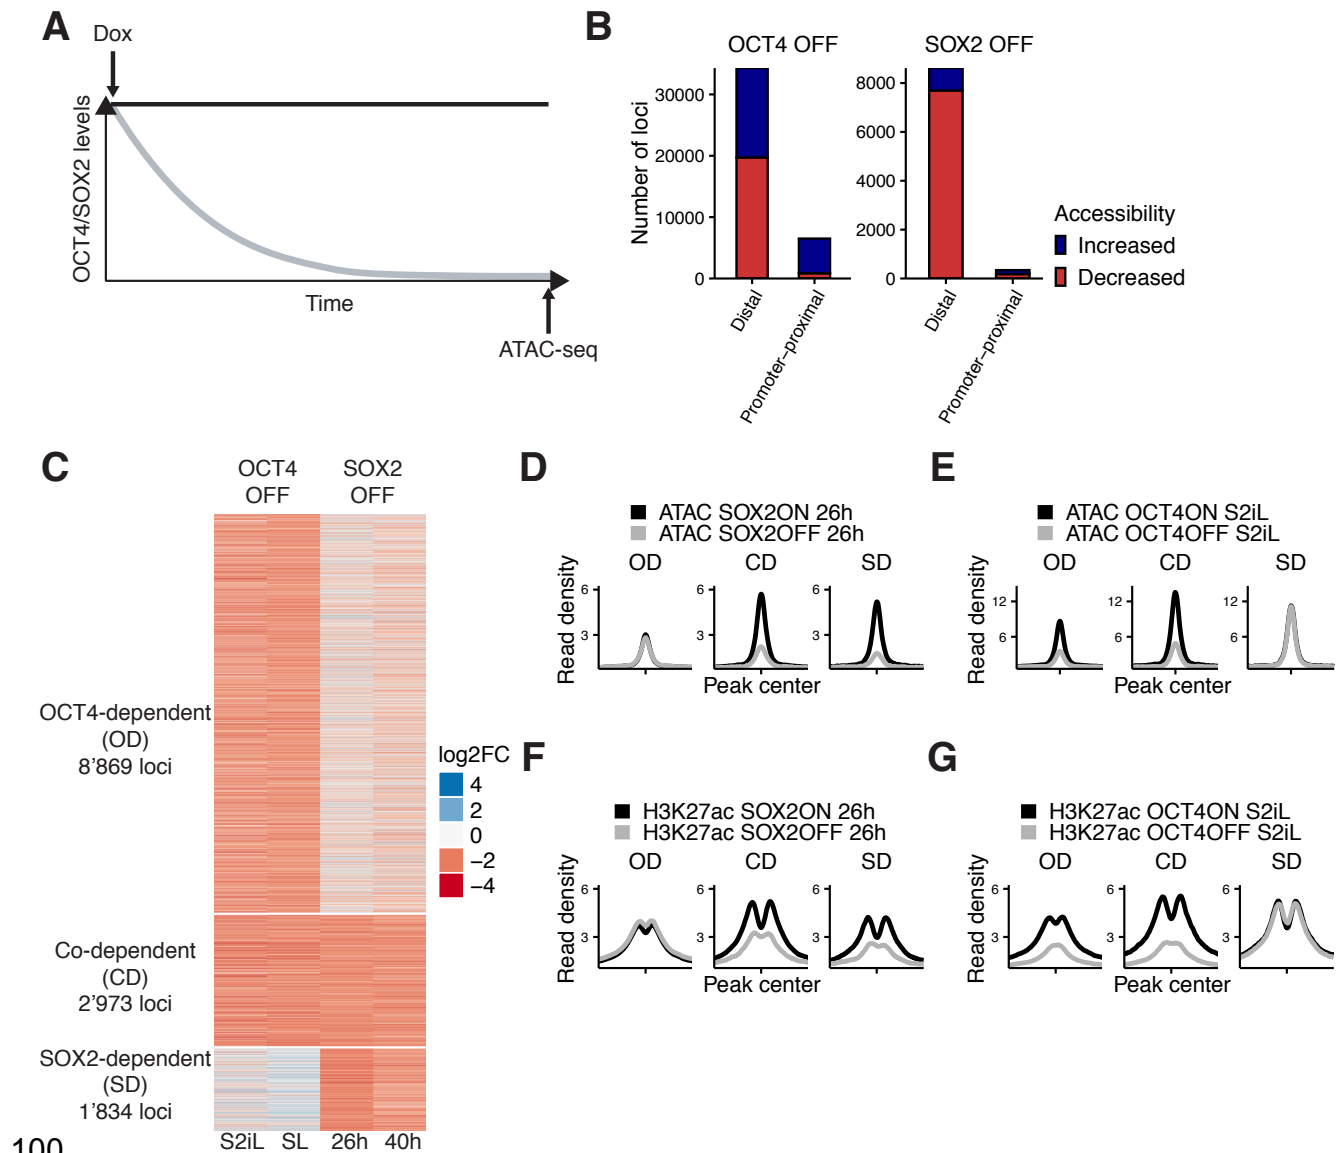

100

101 **Figure 1. Interplay between OCT4 and SOX2 in regulating ES cell chromatin accessibility.** (A)  
102 Experimental strategy to compare the effect of OCT4 and SOX2 depletion on chromatin accessibility.  
103 (B) Number of regions significantly changed in accessibility upon OCT4 (left) and SOX2 (right)  
104 depletion in distal (>1 kb from TSS) and promoter-proximal (<1 kb from TSS) elements. (C) log<sub>2</sub> fold-  
105 change values of accessibility between dox-treated and untreated cells upon OCT4/SOX2 depletion  
106 at OCT4/SOX2 binding sites with decreased accessibility. Loci are grouped into those significantly  
107 affected upon OCT4 depletion (OD), SOX2 depletion (SD), or depletion of either factor (CD). Each  
108 row corresponds to one individual locus, and each column to a different experimental condition. (D-  
109 E) Average RPKM-normalized ATAC-seq signal 2 kb around OD, CD, and SD loci upon SOX2  
110 depletion (D) and OCT4 depletion (E). (F-G) Average RPKM-normalized H3K27ac ChIP-seq signal 2  
111 kb around OD, CD, and SD loci upon SOX2 depletion (F) and OCT4 depletion (G).

112

113 We performed ATAC-seq in ZHBTc4 cells without dox or with dox for 24 hours, and in  
114 2TS22C cells without dox or with dox for 26 or 40 hours. We first compared chromatin  
115 accessibility changes between ZHBTc4 cells +/- dox for 24 hours in our culture conditions  
116 (serum + LIF + 2i (S2iL), see Methods) to a previous dataset acquired with ZHBTc4 cells

117 +/- dox for 24 hours but cultured in serum + LIF (SL) (King and Klose, 2017). The good  
118 correlation (Pearson's  $R=0.7$ ) in chromatin accessibility changes at OCT4 binding sites  
119 between culture conditions (Fig. S1E) prompted us to take advantage of both datasets for  
120 further analysis. We next compared changes in accessibility at SOX2 binding sites in the  
121 2TS22C cell line treated for either 26 or 40 hours with dox, which also displayed a clear  
122 correlation (Pearson's  $R=0.61$ ) (Fig.S1F). We reasoned that the 26 hour dox dataset should  
123 be less prone to changes in accessibility due to indirect effects of prolonged SOX2  
124 depletion than the 40 hour dox dataset, while the latter should be more sensitive to identify  
125 loci that are still accessible at low SOX2 concentrations. We thus called significantly  
126 affected loci using limma (Ritchie et al., 2015) (false discovery rate (FDR)  $< 0.05$ ) and  
127 selected only those in which the direction of change (decrease or increase in accessibility)  
128 was the same for 26 hours vs 40 hours of dox treatment in 2TS22C cells, and likewise for  
129 SL vs S2iL in ZHBTc4 cells. In line with previous reports, loss of OCT4 led to decreased  
130 accessibility at 20'587 loci, most of which are distal regulatory elements (Fig. 1B). Loss of  
131 SOX2 also led to decreased accessibility mainly at distal elements, but at fewer loci (7'874).  
132 We also found that loss of OCT4 led to a gain in accessibility at 20'209 loci, while 1'080 loci  
133 gained accessibility upon loss of SOX2 (Fig. 1B). Loci that lost accessibility were highly  
134 enriched for OCT4 and SOX2 ChIP-seq binding while loci that gained accessibility were  
135 much less so (Fig.S2A-B).

136 To compare the loci impacted by OCT4 vs SOX2 depletion, we next focused on all regions  
137 that were bound by OCT4 and/or SOX2 as identified from available and newly generated  
138 ChIP-seq datasets (see Fig. S2A-B and Methods) and that lost accessibility upon dox  
139 treatment. To avoid misrepresenting differences in SOX2 and OCT4 regulation that arise  
140 from differences in accessibility due to culture conditions or cell lines, we called significantly  
141 different loci (FDR  $< 0.05$ ) between untreated ZHBTc4 cells cultured in SL vs S2iL  
142 conditions as well as between untreated ZHBTc4 cells and 2TS22C cells in S2iL. We then  
143 discarded all loci that displayed a large difference (FC  $> 4$ ) in any of those comparisons.  
144 We classified the remaining loci as OCT4-dependent (OD, 8'869 loci), SOX2-dependent

145 (SD, 1'834 loci), and co-dependent (CD, 2'973 loci), as defined by loss of accessibility upon  
146 depletion of OCT4 only, SOX2 only, or either of them, respectively (Fig. S3A, Fig. 1C-E). All  
147 three groups were enriched for chromatin marks of enhancers (Fig. S3B). We performed  
148 ChIP-seq analysis of the active enhancer mark H3K27ac (Creyghton et al., 2010) upon  
149 OCT4 or SOX2 loss for 24 hours and 26 hours, respectively. All groups displayed a  
150 reduction in H3K27ac, suggesting concordant maintenance of enhancer accessibility and  
151 activity by OCT4 and/or SOX2 at these loci (Fig. 1F-G).

152 Surprisingly, all groups were enriched for the binding of both OCT4 and SOX2 (Fig. 2A).  
153 89% of SD sites overlapped with an OCT4 peak and 65% of OD sites overlapped with a  
154 SOX2 peak. Therefore, differences in the regulation of chromatin accessibility at these loci  
155 cannot simply be explained by differential DNA binding of SOX2 and OCT4. OCT4 has  
156 been shown to regulate chromatin accessibility by recruitment of the BAF chromatin  
157 remodeling complex, including the BRG1 subunit (King and Klose, 2017). As SOX2 also  
158 interacts with BRG1 in vivo (Xu et al., 2018), we asked whether SOX2 also regulates  
159 chromatin accessibility through BRG1 recruitment. We performed BRG1 ChIP-seq upon  
160 SOX2 depletion and reanalyzed ChIP-seq data of BRG1 upon OCT4 depletion (King and  
161 Klose, 2017). We found that loss of accessibility was accompanied by loss of BRG1 in all  
162 groups (Fig. 2B-C). We also reanalyzed ATAC-seq data from cells in which BRG1 has been  
163 depleted (Ho et al., 2011; King and Klose, 2017) and found that all groups were dependent  
164 on BRG1 to maintain their accessibility (Fig. S4A). This suggests that OCT4 and SOX2 can  
165 regulate chromatin accessibility independently of each other even at sites that are co-  
166 occupied and through the recruitment of BRG1.

167

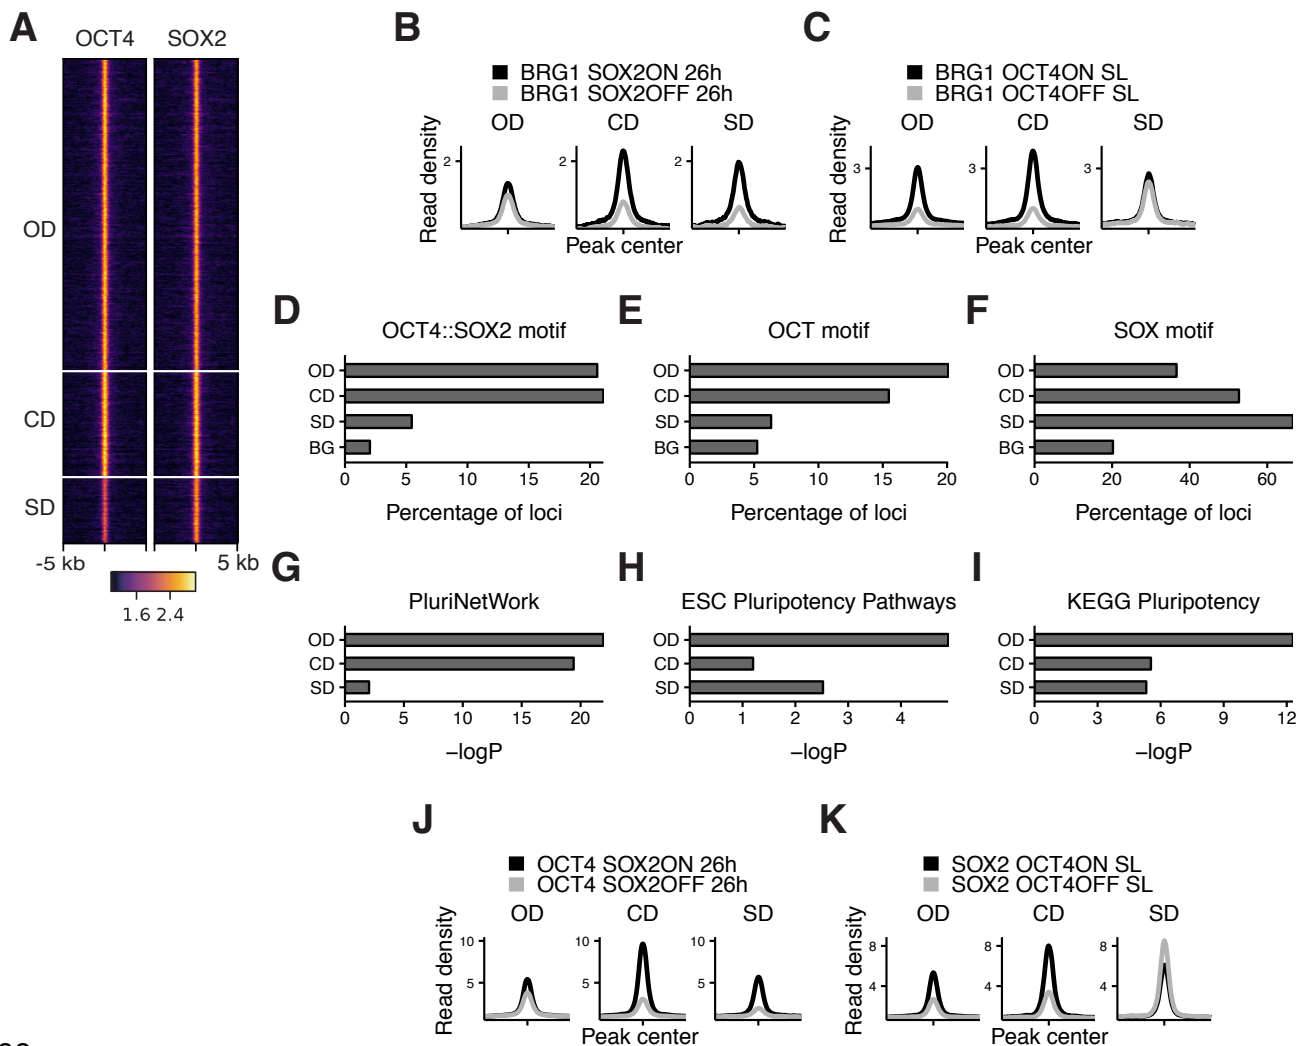

168

169 **Figure 2. Characterization of OCT4/SOX2-dependent loci.** (A) Heatmap of RPKM-normalized  
 170 OCT4 and SOX2 ChIP-seq binding profiles in untreated ZHBTc4 cells at OD, CD, and SD loci. Each  
 171 row represents one individual locus. (B-C) Average RPKM-normalized BRG1 ChIP-seq signal 2 kb  
 172 around OD, CD, and SD loci upon SOX2 depletion (B) and OCT4 depletion (C). (D-F) Frequency of  
 173 overlap with motifs at OD, CD, and SD loci as well as in background regions (BG) for the canonical  
 174 OCT4::SOX2 motif (D), the OCT motif (E), and the SOX motif (F). (G-I) Enrichment (-log(p)) values  
 175 for the closest gene in the OD, CD, and SD groups in the gene ontology sets PluriNetWork (G), ESC  
 176 Pluripotency Pathways (H), and the KEGG gene set "Signaling pathways regulating pluripotency" (I).  
 177 (J-K) Average RPKM-normalized OCT4 (J) and SOX2 (K) ChIP-seq signal 2 kb around OD, CD, and  
 178 SD loci upon SOX2 depletion (J) and OCT4 depletion (K).

179

180 To understand which features distinguish OD, SD, and CD loci, we performed motif  
 181 analysis on the underlying sequences. While both OD and CD loci were strongly enriched  
 182 for the OCT4::SOX2 canonical motif and the OCT motif, SD loci were more enriched for the  
 183 SOX motif (Fig. 2D-F and Table 1). SD sites were also enriched for the AP-2 motif (Fig.  
 184 S4B). TFAP2C, a member of the AP-2 family, is known to regulate differentiation into  
 185 trophoblast stem (TS) cells together with SOX2 (Adachi et al., 2013). Interestingly, when



186 reanalyzing data from TS cells (Adachi et al., 2013; Ishiuchi et al., 2019) we found SD sites  
187 to be highly SOX2-bound and accessible compared to OD and CD loci (Fig. S4C-D).  
188 Furthermore, SD loci were enriched near genes that increased in nascent mRNA  
189 expression upon loss of OCT4 (King and Klose, 2017) (Fig. S4E), which by itself leads to  
190 TS cell differentiation (Adachi et al., 2013). In contrast, OD and CD loci were enriched near  
191 genes that decreased in nascent mRNA expression upon OCT4 depletion (Fig. S4E). We  
192 next aimed to determine the fraction of pluripotency-associated enhancers falling in the OD,  
193 SD, and CD groups. To this end, we checked for enrichment of the nearest gene in three  
194 gene ontology (GO) sets associated specifically with pluripotency. We found that OD loci  
195 were most enriched in all three GO sets (Fig. 2G-I). We also analyzed the binding profiles  
196 of other pluripotency TFs (ESRRB, NANOG, KLF4, SALL4) (Aksoy et al., 2014; Chronis et  
197 al., 2017; Kim et al., 2018; Xiong et al., 2016) and found an enrichment in the CD group,  
198 although all these TFs bound to some extent to all groups of loci (Fig. S4F). Notably, all  
199 groups were also enriched for the “cell differentiation” GO term (Fig. S4G), in line with the  
200 role of OCT4 and SOX2 in ES cell differentiation. Since SOX2 was shown to require  
201 PARP1 to bind to a subset of genomic regions in ES cells (Liu and Kraus, 2017), we asked  
202 whether PARP1 dependence could explain the differential regulation of chromatin  
203 accessibility between these groups. We thus reanalyzed data from wt and PARP1 knockout  
204 (KO) ES cells (Gao et al., 2009; Yang et al., 2004), and found a reduction of SOX2 binding  
205 in PARP1 KO cells at OD, CD, and SD loci (Fig. S4H). Thus, PARP1 dependence cannot  
206 explain the differential regulation of chromatin accessibility between OD, CD, and SD loci.  
207 Overall, these results indicate that OCT4 and SOX2 regulate partially independent sets of  
208 pluripotency and differentiation enhancers, with OCT4 having the largest influence on  
209 chromatin accessibility of pluripotency-associated regulatory elements.  
210  
211

212 **Cooperative binding between OCT4 and SOX2 is mainly mediated indirectly through**  
213 **changes in chromatin accessibility**

214 Several lines of evidence suggest that OCT4 and SOX2 exhibit cooperative DNA binding.  
215 In vitro electrophoretic mobility shift assays and fluorescence correlation spectroscopy  
216 experiments have shown that OCT4 and SOX2 display enhanced binding to the  
217 OCT4::SOX2 motif when binding together (Mistri et al., 2015, 2018). While in vitro  
218 experiments reported OCT4-assisted binding on a purified nucleosomal template (Li et al.,  
219 2019), single-molecule imaging in live ES cells (Chen et al., 2014) and CHIP-seq analysis of  
220 OCT4 in the presence or absence of SOX2 in fibroblasts (Raccaud et al., 2019) have  
221 provided evidence that SOX2 assists OCT4 binding in vivo. However, while these  
222 experiments suggest that OCT4 and SOX2 can display direct cooperativity, the role this  
223 mechanism plays in their colocalization in the complex in vivo chromatin and nuclear  
224 environment is unclear. We reasoned that the independent regulation of chromatin  
225 accessibility by OCT4 and SOX2 at a large number of loci could result in indirect  
226 cooperativity, i.e. each TF could assist the binding of the other through increasing  
227 chromatin accessibility. In line with this hypothesis, it was previously shown that upon loss  
228 of OCT4, SOX2 binding loss is correlated to the loss in chromatin accessibility (King and  
229 Klose, 2017). However, since most of the in vivo evidence points at a role for SOX2 in  
230 mediating cooperative OCT4 DNA-binding rather than vice versa (Chen et al., 2014;  
231 Raccaud et al., 2019), we interrogated genome-wide binding of OCT4 upon loss of SOX2  
232 using CHIP-seq in 2TS22C cells treated with dox for 26 hours. We found that changes in  
233 OCT4 binding were also highly correlated to changes in chromatin accessibility upon SOX2  
234 loss (Pearson's  $R=0.77$ ) (Fig. S5A). We next analyzed OCT4 and SOX2 binding in the  
235 presence or absence of SOX2 and OCT4, respectively, at OD, CD, and SD loci. We found  
236 that OCT4 binding was only slightly decreased at OD sites in the absence of SOX2, while  
237 SOX2 binding at SD sites was mildly increased in the absence of OCT4 (Fig. 2J-K). These  
238 findings were also consistent when narrowing down our analysis to sites containing a  
239 canonical OCT4::SOX2 motif (Fig. S5B-E). The slight loss of OCT4 binding at OD sites in

240 the absence of changes in accessibility suggests that other mechanisms such as  
241 recruitment by SOX2 may play a role in the binding of OCT4, in line with SOX2 enhancing  
242 OCT4 binding.  
243 Upon loss of its partner protein, OCT4 loses binding at 10'264 loci and gains binding at  
244 1'153 loci, while SOX2 loses binding at 7'610 loci and gains binding at 4'423 loci. This  
245 indicates that the ability of OCT4 to occupy its specific binding sites is more impacted by  
246 the absence of SOX2 than vice-versa, and that SOX2 can get rerouted to new loci in the  
247 absence of OCT4. We further noticed that loci gaining accessibility upon loss of OCT4,  
248 which are highly enriched for differentiation terms (Fig. S4G), also gained binding by SOX2  
249 (see Fig. S2A columns 6-7) and were enriched for the SOX and AP-2 motifs (Table 2).  
250 3'484 loci displayed a significant increase in both accessibility and SOX2 binding.  
251 Interestingly, these loci decreased their accessibility upon SOX2 loss (Fig. S5F) and gained  
252 BRG1 occupancy concomitantly with OCT4 loss (Fig. S5G), in line with SOX2 recruiting the  
253 BAF complex to promote chromatin opening. This may suggest that OCT4 sequesters  
254 SOX2 to OCT4-SOX2 sites, and upon OCT4 loss SOX2 is free to bind and increase the  
255 accessibility of differentiation-associated regulatory elements. Overall, these results  
256 indicate that cooperative binding of OCT4 and SOX2 in ES cells is mainly mediated  
257 indirectly through changes in chromatin accessibility. However, while SOX2 enhances  
258 OCT4 binding in general, the presence of OCT4 reroutes SOX2 to pluripotency loci.  
259

### 260 **OCT4 is required at the M-G1 transition to re-establish enhancer accessibility**

261 Transient depletion of OCT4 or SOX2 at the M-G1 transition has been shown to hinder  
262 pluripotency maintenance (Liu et al., 2017; Deluz et al., 2016), but the underlying  
263 mechanisms are not known. This time window coincides with enhancer reopening upon  
264 chromatin decompaction, but whether pioneer factors are involved in this process is not  
265 clear. As we found OCT4 to have the broadest influence on accessibility of pluripotency-  
266 associated loci, we focused on its role in regulating chromatin accessibility at the M-G1  
267 transition. To allow near-complete loss of OCT4 at the M-G1 transition, we used ZHBTc4

268 cells constitutively expressing OCT4 fused to a SNAP-tag and a Cyclin B1 degron (mitotic  
269 degron; MD) or a mutated version thereof (MD\*; Fig. 3A), which have been described  
270 previously (Kadauke et al., 2012). Importantly, lower than wildtype levels of OCT4 have  
271 been shown to sustain or even enhance pluripotency (Karwacki-Neisius et al., 2013;  
272 Radzsheuskaya et al., 2013). We thus reasoned that OCT4 levels need to decrease below  
273 a certain threshold to impact chromatin accessibility of pluripotency regulatory elements.  
274 Furthermore, the MD strategy strongly decreases but does not fully eliminate the target  
275 protein (Deluz et al., 2016; Liu et al., 2017). We therefore expressed MD-OCT4 and MD\*-  
276 OCT4 at lower than wildtype levels from the constitutively active but relatively weak PGK  
277 promoter. After lentiviral transduction of the constructs, we stained cells with the SNAP-Cell  
278 647-SiR dye (Lukinavičius et al., 2013) and sorted for a narrow window of SNAP  
279 expression to obtain the same average level of OCT4 tagged with MD and MD\* across the  
280 cell cycle, as described previously (Deluz et al., 2016) (Fig. S6A). We also transduced cells  
281 to express YPet-MD in a constitutive manner, which allows for discrimination between cells  
282 in early G1 (YPet-negative) and late G1 phase (YPet-positive). In combination with Hoechst  
283 staining, this enables sorting cells in early G1 (EG1), late G1 (LG1), S, and late S/G2 (SG2)  
284 phase as described previously (Kadauke et al., 2012) (Fig. S6B). SNAP-MD-OCT4 levels  
285 were correlated with YPet-MD levels in flow cytometry, indicating that OCT4 levels are  
286 restored in LG1 in MD-OCT4 cells (Fig. S6C), as shown previously (Liu et al., 2017). In the  
287 absence of dox, these cell lines display no substantial difference in chromatin accessibility  
288 at OCT4-regulated loci (Fig. S6D). When grown in the presence of dox, MD\*-OCT4 cells  
289 maintain a higher fraction of dome-shaped colonies, higher alkaline phosphatase activity,  
290 higher expression of pluripotency markers and lower expression of differentiation markers  
291 (Fig. S6E-G) than MD-OCT4 cells, as also shown previously (Liu et al., 2017).  
292

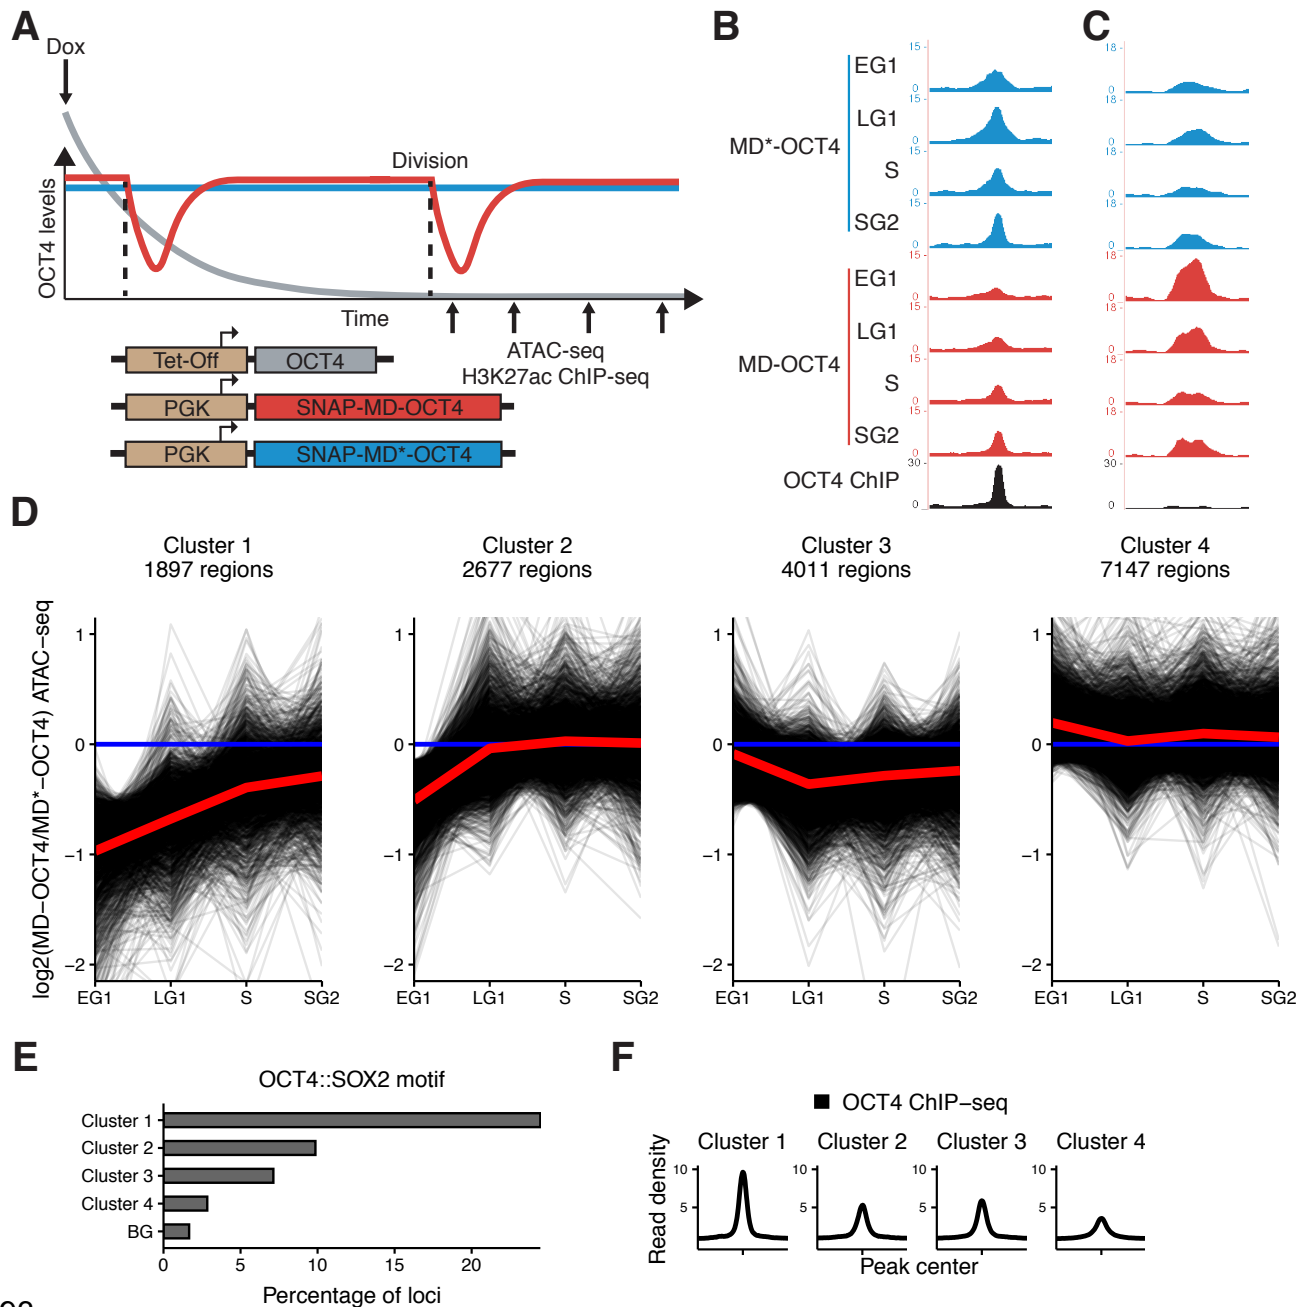

293

294 **Figure 3. Mitotic degradation of OCT4 results in different patterns of accessibility loss.** (A)  
 295 Experimental strategy used to assess the impact of OCT4 depletion at the M-G1 transition. (B-C)  
 296 Genome browser tracks of RPKM-normalized accessibility profiles across the cell cycle for one locus  
 297 that decreases (B) at chr11:6894809-6895533 and one that increases (C) at chr9:41247953-  
 298 4124841 in accessibility upon transient OCT4 depletion in M-G1. (D)  $\log_2$  fold-change values of  
 299 accessibility between MD-OCT4 and MD\*-OCT4 (control) cells in different cell cycle phases at all  
 300 accessible OCT4-bound sites, grouped into four clusters by k-means clustering (see Methods). Each  
 301 line represents one locus. Red line: mean of each cluster. (E) Frequency of overlap with the  
 302 canonical OCT4::SOX2 motif in the four clusters as well as in background regions (BG). (F) Average  
 303 RPKM-normalized OCT4 ChIP-seq signal in untreated ZHBTc4 cells 2 kb around loci in the four  
 304 clusters.

305

306 To test whether depletion of OCT4 at the M-G1 transition affects chromatin accessibility, we  
307 treated cells with dox for 40 hours to ensure that all cells have gone through at least one  
308 cell division expressing only MD or MD\*-tagged OCT4. Note that dox-treated cells had a  
309 longer G1 phase as compared to wt ES cells, as shown before to be a consequence of  
310 lower than wt OCT4 levels (Lee et al., 2010). However, there was no difference in the  
311 proportion of cells in the different cell cycle phases between MD-OCT4 and MD\*-OCT4  
312 (Fig. S6H). We sorted cells in EG1, LG1, S, and SG2 phases, performed ATAC-seq, and  
313 compared the accessibility between MD-OCT4 and MD\*-OCT4 cells at each cell cycle  
314 phase. OCT4-regulated loci that increased or decreased in accessibility upon complete  
315 OCT4 depletion (see Fig. 1B) were also affected by transient M-G1 degradation (Fig. S6I-J,  
316 Fig. 3B-C). This shows that OCT4 is required at the M-G1 transition to restore chromatin  
317 accessibility and that loci gaining accessibility upon OCT4 loss are also dynamically  
318 regulated by OCT4 levels.

319 To characterize the different dynamic behaviors of chromatin accessibility changes across  
320 the cell cycle, we used k-means clustering on the change in accessibility between MD-  
321 OCT4 and MD\*-OCT4 cells at all accessible loci displaying an OCT4 ChIP-seq peak (Fig.  
322 3D). Two clusters displayed decreased accessibility in EG1 and recovered their  
323 accessibility incompletely (cluster 1) or completely (cluster 2) over the cell cycle. Notably,  
324 cluster 2 loci were less affected in EG1 than cluster 1 loci, which likely explains their  
325 complete recovery. Cluster 3 loci were characterized by a minor decrease in accessibility  
326 but that persisted over the cell cycle, and cluster 4 loci were unaffected by OCT4 loss. In  
327 contrast to clusters 1-3, cluster 4 was enriched near TSSs (Fig. S7A) and for the H3K4me3  
328 promoter mark (Cao et al., 2018) (Fig. S7B), in line with OCT4 generally not affecting  
329 accessibility at promoters (Fig.1B and (King and Klose, 2017)). However, cluster 4 also  
330 contained many loci enriched for active enhancer marks (H3K4me1 and H3K27ac) (Kumar  
331 et al., 2016; Rickels et al., 2017), similar to clusters 1-3 (Fig. S7B). To test whether active  
332 histone marks also acutely change upon rapid loss of OCT4, we performed ChIP-seq for  
333 H3K27ac across the cell cycle in cells expressing MD-OCT4 or MD\*-OCT4. The difference

334 in H3K27ac across the cell cycle between the SNAP-MD-OCT4 and SNAP-MD\*-OCT4 cell  
335 lines mimicked the corresponding changes in accessibility, although with smaller amplitude  
336 (Fig. S7C-D), suggesting that this modification is also highly dynamic and sensitive to  
337 OCT4 levels. We analyzed the fraction of regions in the different clusters overlapping  
338 previously annotated ES cell super-enhancers (SEs) and “typical” enhancers (TEs) (Sabari  
339 et al., 2018). We found these to be enriched in all clusters compared to non-OCT4 bound  
340 regions, with slightly more enrichment in clusters 1 and 3 for both SEs and TEs. This  
341 suggests that a large fraction of both SEs and TEs are permanently affected by the  
342 transient loss of OCT4 at the M-G1 transition (Fig. S7E).

343 As mentioned before, pluripotency was shown to be maintained at lower than wild type  
344 OCT4 expression levels. To ask whether chromatin accessibility of the observed clusters  
345 was OCT4 level-dependent within a higher OCT4 concentration range, we interrogated  
346 chromatin accessibility in the context of physiological variations of OCT4 levels. To do so,  
347 we took advantage of ATAC-seq data we previously acquired on cells differing in their  
348 OCT4 levels by a factor of ~2, due to temporal fluctuations in their endogenous levels  
349 (Strebinger et al., 2019). We compared chromatin accessibility of the different clusters we  
350 identified for cells expressing high versus low endogenous levels of OCT4 and found  
351 virtually no differences in chromatin accessibility between these groups across all clusters  
352 (Fig.S7F), consistent with the ability of moderately low OCT4 levels to fully sustain  
353 pluripotency.

354 To understand the reason for the differential impact of transient OCT4 depletion on  
355 chromatin accessibility, we performed motif search analysis and compared OCT4 binding at  
356 the different clusters. We found a higher enrichment for the canonical OCT4::SOX2 motif  
357 (Fig.3E) and a higher OCT4 occupancy (Fig.3F) at cluster 1 loci. Consistently, cluster 1  
358 contained mostly OD and CD loci identified above (Fig. S7G). We did not find strong  
359 differential enrichment for other motifs that could explain the differential regulation of these  
360 loci (Table 3). As high OCT4 binding was a signature of the loci most sensitive to transient  
361 OCT4 loss, we next aimed to determine the relationship between OCT4 binding and

362 chromatin accessibility. We compared chromatin accessibility in ZHBTc4 cells in the  
363 presence or absence of OCT4 in conditions with matched OCT4 ChIP-seq and ATAC-seq  
364 data (King and Klose, 2017). The OCT4 ChIP-seq signal was correlated to loss of  
365 accessibility upon OCT4 depletion (Fig. S8A) as shown previously, but also to chromatin  
366 accessibility in untreated cells (Fig. S8B), indicating that strong OCT4 binding sites are both  
367 highly accessible and sensitive to OCT4 levels. Taken together, these results reveal  
368 different classes of OCT4-bound loci that show different cell cycle accessibility dynamics  
369 upon OCT4 loss at the M-G1 transition, and that highly bound sites are particularly  
370 accessible and sensitive to OCT4 loss for the maintenance of their accessibility and H3K27  
371 acetylation.

372

### 373 **OCT4 is required throughout the cell cycle to maintain enhancer accessibility**

374 We next asked whether OCT4 also plays a role in maintaining enhancer accessibility in  
375 other cell cycle phases. To do so, we generated a cell line allowing drug-inducible  
376 degradation of OCT4. Briefly, we used lentiviral vectors to constitutively express the Tir1  
377 ubiquitin ligase (allowing Auxin-inducible ubiquitination and degradation of target proteins  
378 (Dharmasiri et al., 2005; Kepinski and Leyser, 2005)) and OCT4 fused to mCherry and an  
379 Auxin-inducible degron tag (Morawska and Ulrich, 2013; Nishimura et al., 2009) (mCherry-  
380 OCT4-AID) in ZHBTc4 cells (Fig. 4A). To ensure near-complete OCT4 depletion, we  
381 expressed OCT4-AID at low levels using the PGK promoter. We further expressed YPet-  
382 MD in this cell line to allow for cell sorting in different cell cycle phases, as described above.  
383 Upon addition of indole-3-acetic acid (IAA, also known as Auxin), the AID-tagged OCT4  
384 displayed an exponential degradation profile with a half-life of 0.32 h (Fig. 4B). After IAA  
385 washout, OCT4 recovered to approximately half of the concentration before IAA treatment  
386 within ~4.5 hours (Fig.4C), in line with the OCT4 protein half-life of ~4 hours (Alber et al.,  
387 2018).



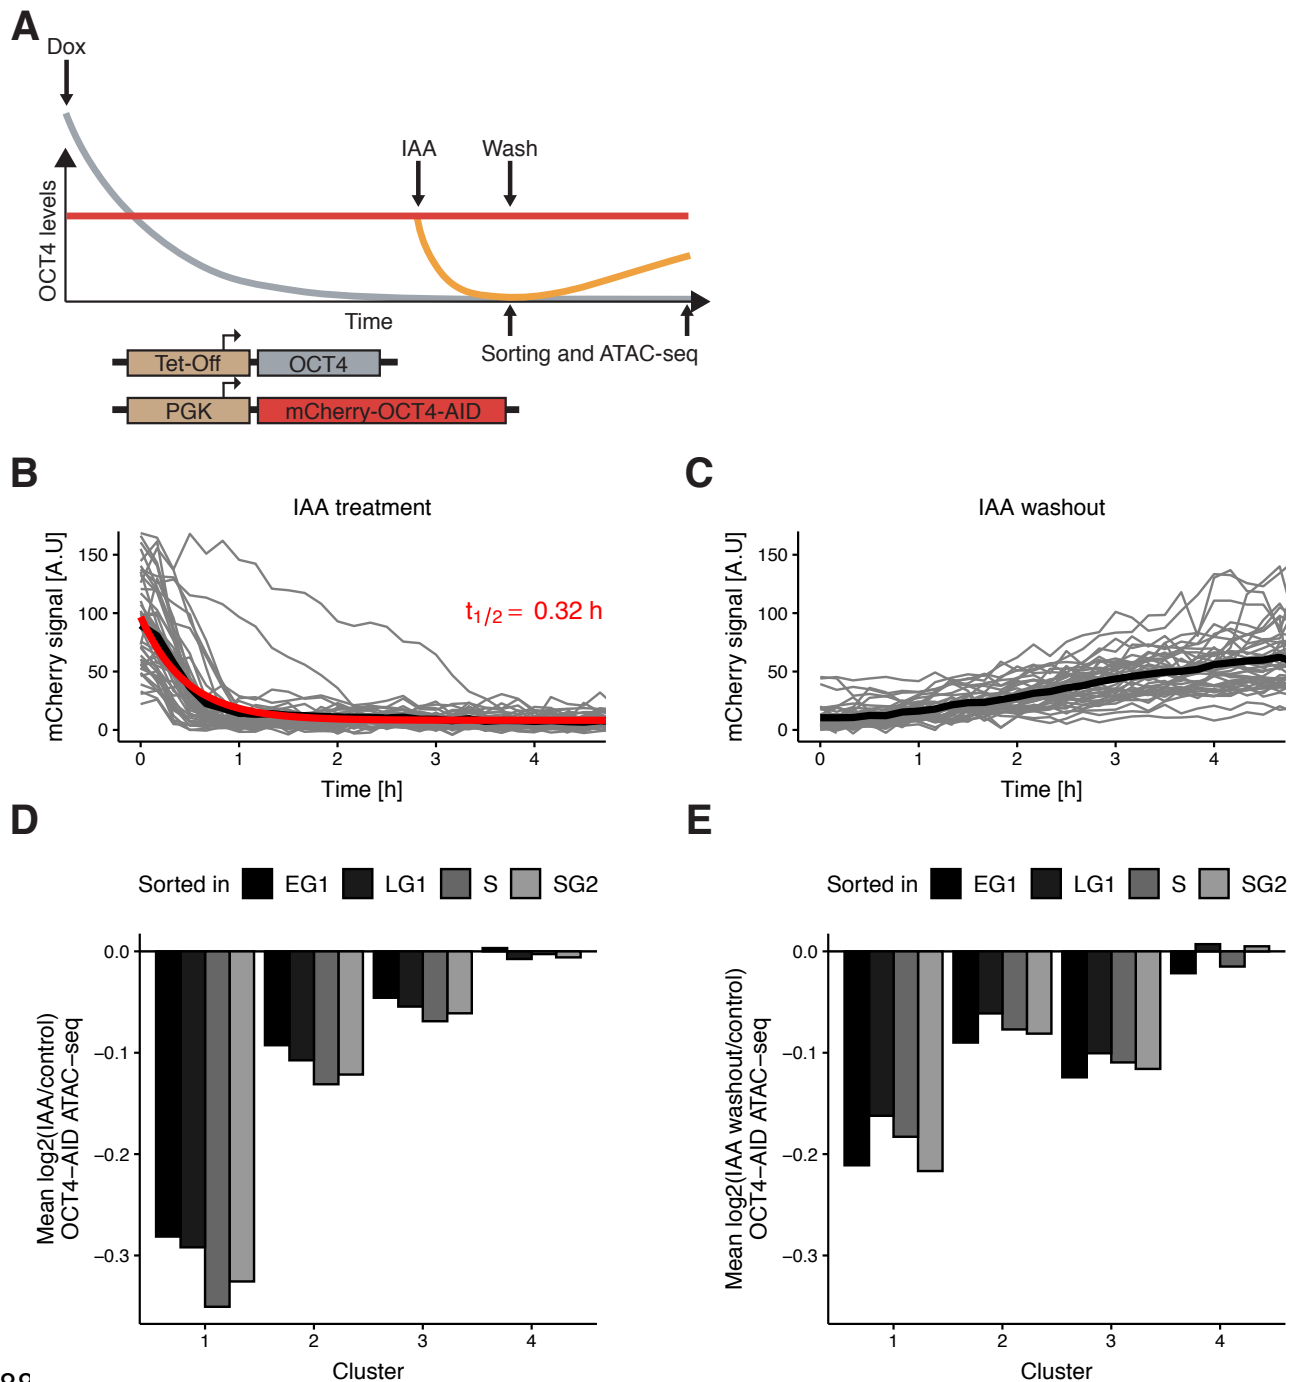

388

389 **Figure 4. Auxin-inducible degradation reveals pioneer activity of OCT4 at different cell cycle**  
 390 **phases.** (A) Experimental strategy used to assess the impact of OCT4 depletion and recovery at  
 391 different cell cycle phases. (B) Red fluorescence (mCherry) signal in mCherry-OCT4-AID cells  
 392 treated with IAA at  $t=0$  as measured by fluorescence microscopy. Gray lines: single cell traces; Black  
 393 line: population average; Red line: exponential fit. Red text: half-life value derived from the  
 394 exponential fit. (C) Red fluorescence (mCherry) signal in mCherry-OCT4-AID treated with IAA for  
 395 2.5h and then washed out at  $t=0$  as measured by fluorescence microscopy. Gray lines: single cell  
 396 traces; Black line: population average. (D) Average  $\log_2$  fold-change values of accessibility between  
 397 IAA-treated and untreated OCT4-AID cells in the four clusters from Fig. 3D at each cell cycle phase.  
 398 (E) Average  $\log_2$  fold-change values of accessibility between cells first treated with IAA and then  
 399 washed out, compared to untreated OCT4-AID cells for the four clusters from Fig. 3D at each cell  
 400 cycle phase.

401

402 To verify that OCT4 degradation kinetics are similar across the cell cycle, we applied IAA  
403 for 0.5 h (partial degradation) and 2 h (full degradation) before analyzing the mCherry  
404 signal by flow cytometry. At 2 hours of treatment, mCherry levels were similar to those of  
405 mCherry negative cells (Fig. S9A). We observed highly similar changes in the mCherry  
406 signal across all cell cycle phases (Fig. S9B-C), consistent with previous reports on the cell  
407 cycle-independence of Auxin-mediated protein degradation (Holland et al., 2012). OCT4  
408 recovery after IAA washout was also very similar across the cell cycle (Fig. S9D). After  
409 addition of dox for 24 hours to remove untagged OCT4, we treated cells with IAA or not for  
410 2 hours, sorted for different cell cycle phases, and performed ATAC-seq (Fig. 4A). The  
411 relative magnitude of change in accessibility in the different clusters was consistent with our  
412 mitotic degradation experiment (Fig. 4D). Remarkably, the average loss of accessibility was  
413 very similar at all cell cycle phases in clusters 1-3 (Fig. 4D, Fig. S9E).

414 Next, we quantified the recovery of chromatin accessibility across the cell cycle. We treated  
415 OCT4-AID cells with dox for 24 hours, then with IAA or not for 2.5h, washed out the drug  
416 and incubated cells for 4.5 hours, sorted cells in different cell cycle phases and performed  
417 ATAC-seq (Fig. 4A). While both cluster 1 (Fig. S9F) and 2 substantially recovered  
418 chromatin accessibility, cluster 3 loci did not (Fig.4E), in line with their permanent decrease  
419 of accessibility over the cell cycle upon OCT4 degradation at the M-G1 transition (see Fig.  
420 3D). Overall, these data show that OCT4 is required across the cell cycle to maintain  
421 chromatin accessibility at enhancer elements.

422

### 423 **Dynamic relationship between OCT4 concentration and chromatin accessibility**

424 We next aimed to quantify the dynamics of chromatin accessibility changes in response to  
425 OCT4 loss. Since residence times of OCT4 on specific DNA sites are in the second-range  
426 (Chen et al., 2014; Teves et al., 2016; Deluz et al., 2016), we reasoned that if continuous  
427 OCT4 re-binding is required to maintain chromatin accessibility, changes in chromatin  
428 accessibility and OCT4 concentration should occur in a quasi-synchronized manner. To test  
429 this hypothesis, we performed a time-course experiment by treating OCT4-AID cells with

430 IAA for 0.5h, 1h, 2h, 3h, 4h, 6h, and 10h, and performed ATAC-seq at each time point. We  
431 took advantage of our different clusters, which showed differential response to OCT4 loss  
432 at the M-G1 transition (see Fig. 3D), and analyzed accessibility loss at these loci over time.  
433 At all OCT4-responsive clusters (1-3), accessibility loss was near-complete after 1 hour of  
434 IAA treatment (Fig. 5A-B), in line with accessibility being highly dynamic with OCT4 levels.  
435 At 6 and 10 hours of treatment, cluster 4 sites that were insensitive to OCT4 degradation at  
436 the M-G1 transition started to lose accessibility, suggesting a broader and potentially  
437 indirect impact of OCT4 loss on chromatin accessibility (Fig. 5A). We thus focused on the  
438 first 4 hours of OCT4 removal to estimate the kinetics of accessibility loss. We fitted a  
439 single-component exponential function including an offset to account for the residual ATAC-  
440 seq signal after OCT4 loss. At clusters 1-3, the half-life of accessibility loss was remarkably  
441 close to the half-life of OCT4-AID upon IAA treatment, i.e. around 0.5 hours (Fig. 5C-E). We  
442 were unable to fit an exponential decay to cluster 4, as expected from its OCT4-  
443 independent chromatin accessibility regulation (Fig. 5F). In summary, these data suggest  
444 that regulation of enhancer accessibility is extremely dynamic and requires the constant  
445 presence of OCT4.  
446

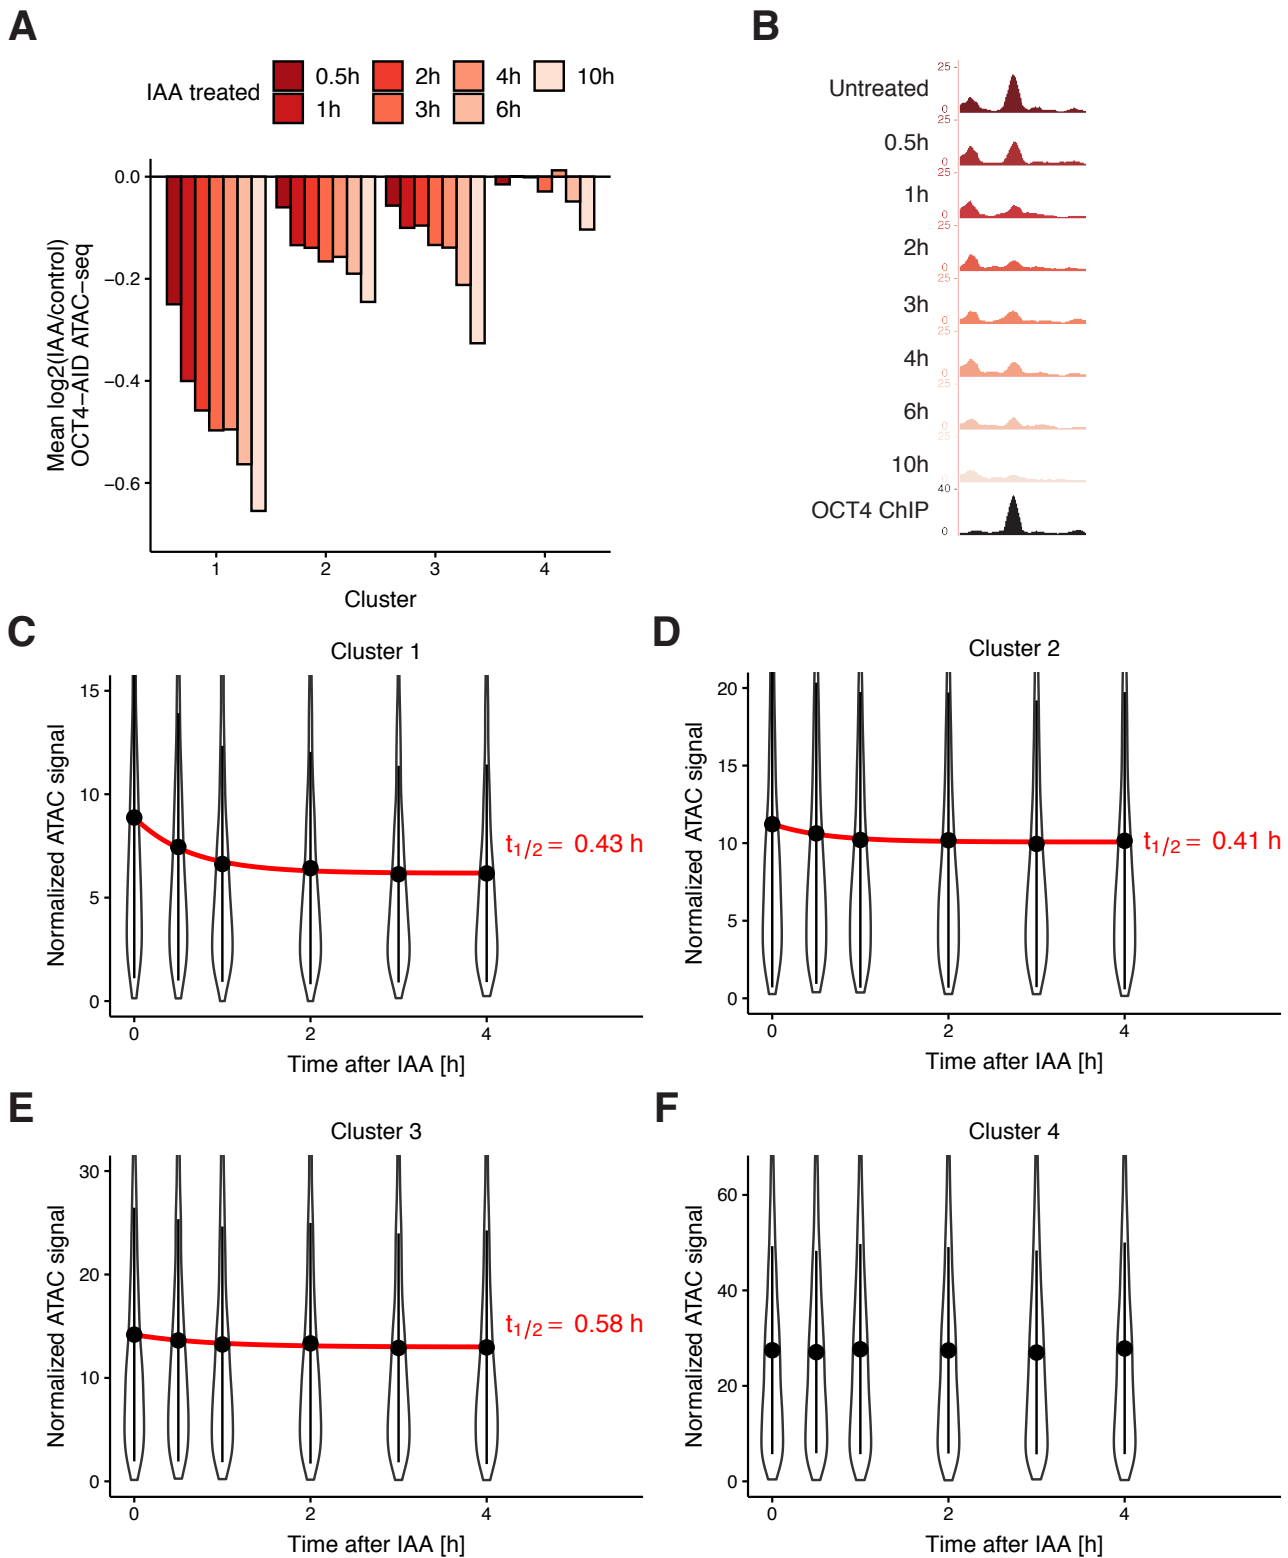

447

448 **Figure 5. Time course analysis of chromatin accessibility changes during OCT4 degradation**  
 449 **reveals its highly dynamic pioneer activity.** (A)  $\log_2$  fold-change values of accessibility compared  
 450 to untreated cells in the four clusters from Fig. 3D at different time points of IAA treatment. (B)  
 451 Genome browser track of accessibility profiles upon treatment with IAA for different durations at a  
 452 cluster 1 locus at chr3:137779908-137780687. (C-F) Violin plot of normalized ATAC-seq signal  
 453 across different time points in cluster 1 (C), cluster 2 (D), cluster 3 (E), and cluster 4 (F). Dots: mean;

454 *Vertical lines: standard deviation; Red lines in C-E: exponential fit; Red text in C-E: half-life value*  
455 *derived from the exponential fit.*

456

## 457 **Discussion**

458 In this study we dissected the roles and interplay of OCT4 and SOX2 in regulating  
459 chromatin accessibility in ES cells. To our surprise, we found a large number of enhancers  
460 that were bound by both transcription factors but for which chromatin accessibility was  
461 regulated by only one of them. In the future it will be interesting to explore whether  
462 differences in the topology of OCT4 and SOX2 binding sites on the nucleosome surface or  
463 genomic location-dependent DNA residence times could explain these findings. Our results  
464 also show that both OCT4 and SOX2 regulate the genomic occupancy of each other mainly  
465 via regulation of chromatin accessibility. This is reminiscent of dynamic assisted loading, in  
466 which two TFs assist the loading of each other to either the same or nearby DNA binding  
467 sites (Swinstead et al., 2016; Goldstein et al., 2017).

468 Surprisingly, upon OCT4 loss chromatin accessibility increased at a large number of  
469 genomic sites enriched for proximity to differentiation genes, even when OCT4 was  
470 degraded for a brief period of time at the M-G1 transition. The fact that SOX2 occupies  
471 these sites and is required to maintain their accessibility suggests that in the absence of  
472 OCT4, SOX2 is rerouted to these loci and promotes differentiation together with other  
473 partners such as TFAP2C. Therefore, the rapid action of OCT4 in early G1 phase might be  
474 required to ensure both the maintenance of chromatin accessibility at pluripotency  
475 enhancers and to silence differentiation enhancers. Whether the previously shown  
476 association of OCT4 to mitotic chromosomes (Deluz et al., 2016; Liu et al., 2017; Teves et  
477 al., 2016) facilitates its action in early G1 will require further investigation.

478 We found that OCT4 degradation leads to a rapid decrease in chromatin accessibility at all  
479 clusters of OCT4-regulated enhancers across the cell cycle with very similar kinetics, which  
480 tightly mirrored changes in OCT4 concentration and thus suggests highly dynamic  
481 regulation of chromatin accessibility by OCT4. However, the recovery of chromatin

482 accessibility upon increase of OCT4 concentration displayed locus-dependent behavior. In  
483 contrast to clusters 1 and 2, cluster 3 loci did not recover over the time course of several  
484 hours either after M-G1 or auxin-induced degradation. While the mechanisms underlying  
485 these findings are unclear, permanent loss (cluster 3) or incomplete recovery (cluster 1) of  
486 chromatin accessibility may explain why OCT4 loss at the M-G1 transition results in  
487 impaired pluripotency maintenance.

488 Protein depletion by degron systems works by increasing protein degradation rates without  
489 affecting their synthesis rate. Therefore, they suffer from an inherent tradeoff in maximizing  
490 expression levels when the degron is inactive while minimizing residual expression level  
491 when the degron is active. Here we expressed OCT4 at relatively low levels to ensure  
492 sufficient depletion, allowing us to show that the pioneering function of OCT4 is required  
493 constantly and throughout the cell cycle to maintain enhancer accessibility. However, the  
494 relatively low dynamic range of accessibility changes prohibits sensitive detection of  
495 specific loci that are quantitatively more or less sensitive to OCT4 loss at different cell cycle  
496 phases. Furthermore, whether recurrent, transient loss of OCT4 outside of the M-G1  
497 transition would also lead to pluripotency loss would have to be addressed in future studies.

498 Here we found that OCT4 is constantly required to maintain chromatin accessibility in self-  
499 renewing ES cells. This is reminiscent of a recent study showing that the pioneer factor  
500 Zelda is required throughout zygotic genome activation in *Drosophila* for proper gene  
501 expression (McDaniel et al., 2019). In contrast, in the context of pituitary lineage  
502 specification PAX7 requires 72 hours to fully open melanotrope-specific enhancers but is  
503 subsequently not required to maintain these (Mayran et al., 2018). It is possible that PAX7  
504 hands over the role of maintaining accessibility to other factors, such as TPIT (Mayran et  
505 al., 2019), and is only required at the transition between cell fates. This indicates that  
506 pioneering activity can have different manifestations that depend heavily on other  
507 regulatory factors and chromatin features. Pluripotent stem cells may be particularly  
508 dynamic in this regard, as they need to be able to quickly rewire their gene expression  
509 programs upon receiving differentiation signals. In contrast, more differentiated cell types

510 may have mechanisms to avoid precocious changes in gene expression upon subtle  
511 alterations in the concentration of TFs. Therefore, the high sensitivity of enhancers to the  
512 concentration or activity of pioneer TFs in ES cells could serve as a mechanism to regulate  
513 cell fate with precise temporal control.

514

## 515 **References**

- 516 Adachi K, Nikaido I, Ohta H, Ohtsuka S, Ura H, Kadota M, Wakayama T, Ueda HR, Niwa  
517 H. 2013. Context-Dependent Wiring of Sox2 Regulatory Networks for Self-Renewal of  
518 Embryonic and Trophoblast Stem Cells. *Molecular Cell* **52**:380–392.  
519 doi:10.1016/j.molcel.2013.09.002
- 520 Aksoy I, Giudice V, Delahaye E, Wianny F, Aubry M, Mure M, Chen J, Jauch R, Bogu GK,  
521 Nolden T, Himmelbauer H, Xavier Doss M, Sachinidis A, Schulz H, Hummel O, Martinelli P,  
522 Hübner N, Stanton LW, Real FX, Bourillot P-Y, Savatier P. 2014. Klf4 and Klf5 differentially  
523 inhibit mesoderm and endoderm differentiation in embryonic stem cells. *Nat Commun*  
524 **5**:3719. doi:10.1038/ncomms4719
- 525 Alber AB, Paquet ER, Biserni M, Naef F, Suter DM. 2018. Single Live Cell Monitoring of  
526 Protein Turnover Reveals Intercellular Variability and Cell-Cycle Dependence of  
527 Degradation Rates. *Mol Cell* **71**:1079-1091.e9. doi:10.1016/j.molcel.2018.07.023
- 528 Boyer LA, Lee TI, Cole MF, Johnstone SE, Levine SS, Zucker JP, Guenther MG, Kumar  
529 RM, Murray HL, Jenner RG, Gifford DK, Melton DA, Jaenisch R, Young RA. 2005. Core  
530 Transcriptional Regulatory Circuitry in Human Embryonic Stem Cells. *Cell* **122**:947–956.  
531 doi:10.1016/j.cell.2005.08.020
- 532 Buenrostro JD, Giresi PG, Zaba LC, Chang HY, Greenleaf WJ. 2013. Transposition of  
533 native chromatin for fast and sensitive epigenomic profiling of open chromatin, DNA-binding  
534 proteins and nucleosome position. *Nat Methods* **10**:1213–1218. doi:10.1038/nmeth.2688
- 535 Cao K, Collings CK, Morgan MA, Marshall SA, Rendleman EJ, Ozark PA, Smith ER,  
536 Shilatifard A. 2018. An Mll4/COMPASS-Lsd1 epigenetic axis governs enhancer function  
537 and pluripotency transition in embryonic stem cells. *Sci Adv* **4**:eaap8747.  
538 doi:10.1126/sciadv.aap8747
- 539 Carpenter AE, Jones TR, Lamprecht MR, Clarke C, Kang IH, Friman O, Guertin DA, Chang  
540 JH, Lindquist RA, Moffat J, Golland P, Sabatini DM. 2006. CellProfiler: image analysis  
541 software for identifying and quantifying cell phenotypes. *Genome Biol* **7**:R100.  
542 doi:10.1186/gb-2006-7-10-r100
- 543 Chen J, Zhang Z, Li L, Chen B-C, Revyakin A, Hajj B, Legant W, Dahan M, Lionnet T,  
544 Betzig E, Tjian R, Liu Z. 2014. Single-Molecule Dynamics of Enhanceosome Assembly in  
545 Embryonic Stem Cells. *Cell* **156**:1274–1285. doi:10.1016/j.cell.2014.01.062
- 546 Chen W, Gardeux V, Meireles-Filho A, Deplancke B. 2017. Profiling of Single-Cell  
547 Transcriptomes. *Curr Protoc Mouse Biol* **7**:145–175. doi:10.1002/cpmo.30
- 548 Chronis C, Fiziev P, Papp B, Butz S, Bonora G, Sabri S, Ernst J, Plath K. 2017.  
549 Cooperative Binding of Transcription Factors Orchestrates Reprogramming. *Cell* **168**:442-  
550 459.e20. doi:10.1016/j.cell.2016.12.016
- 551 Cirillo LA, Lin FR, Cuesta I, Friedman D, Jarnik M, Zaret KS. 2002. Opening of Compacted  
552 Chromatin by Early Developmental Transcription Factors HNF3 (FoxA) and GATA-4.  
553 *Molecular Cell* **9**:279–289. doi:10.1016/S1097-2765(02)00459-8

- 554 Creighton MP, Cheng AW, Welstead GG, Kooistra T, Carey BW, Steine EJ, Hanna J,  
555 Lodato MA, Frampton GM, Sharp PA, Boyer LA, Young RA, Jaenisch R. 2010. Histone  
556 H3K27ac separates active from poised enhancers and predicts developmental state. *Proc*  
557 *Natl Acad Sci U S A* **107**:21931–21936. doi:10.1073/pnas.1016071107
- 558 Deluz C, Friman ET, Strebinger D, Benke A, Raccaud M, Callegari A, Leleu M, Manley S,  
559 Suter DM. 2016. A role for mitotic bookmarking of SOX2 in pluripotency and differentiation.  
560 *Genes Dev* **30**:2538–2550. doi:10.1101/gad.289256.116
- 561 Dharmasiri N, Dharmasiri S, Estelle M. 2005. The F-box protein TIR1 is an auxin receptor.  
562 *Nature* **435**:441. doi:10.1038/nature03543
- 563 Dobin A, Davis CA, Schlesinger F, Drenkow J, Zaleski C, Jha S, Batut P, Chaisson M,  
564 Gingeras TR. 2013. STAR: ultrafast universal RNA-seq aligner. *Bioinformatics* **29**:15–21.  
565 doi:10.1093/bioinformatics/bts635
- 566 Dull T, Zufferey R, Kelly M, Mandel RJ, Nguyen M, Trono D, Naldini L. 1998. A Third-  
567 Generation Lentivirus Vector with a Conditional Packaging System. *Journal of Virology*  
568 **72**:8463–8471.
- 569 Dunn SJ, Martello G, Yordanov B, Emmott S, Smith AG. 2014. Defining an essential  
570 transcription factor program for naive pluripotency. *Science* **344**:1156–60.  
571 doi:10.1126/science.1248882
- 572 Durinck S, Moreau Y, Kasprzyk A, Davis S, De Moor B, Brazma A, Huber W. 2005. BioMart  
573 and Bioconductor: a powerful link between biological databases and microarray data  
574 analysis. *Bioinformatics* **21**:3439–3440. doi:10.1093/bioinformatics/bti525
- 575 Edgar R, Domrachev M, Lash AE. 2002. Gene Expression Omnibus: NCBI gene  
576 expression and hybridization array data repository. *Nucleic Acids Res* **30**:207–210.  
577 doi:10.1093/nar/30.1.207
- 578 Egli D, Birkhoff G, Eggan K. 2008. Mediators of reprogramming: transcription factors and  
579 transitions through mitosis. *Nat Rev Mol Cell Biol* **9**:505–516. doi:10.1038/nrm2439
- 580 ENCODE Project Consortium. 2012. An integrated encyclopedia of DNA elements in the  
581 human genome. *Nature* **489**:57–74. doi:10.1038/nature11247
- 582 Festuccia N, Owens N, Papadopoulou T, Gonzalez I, Tachtsidi A, Vandoermel-Pournin S,  
583 Gallego E, Gutierrez N, Dubois A, Cohen-Tannoudji M, Navarro P. 2019. Transcription  
584 factor activity and nucleosome organization in mitosis. *Genome Res* **29**:250–260.  
585 doi:10.1101/gr.243048.118
- 586 Gao F, Kwon SW, Zhao Y, Jin Y. 2009. PARP1 Poly(ADP-ribosyl)ates Sox2 to Control  
587 Sox2 Protein Levels and FGF4 Expression during Embryonic Stem Cell Differentiation. *J*  
588 *Biol Chem* **284**:22263–22273. doi:10.1074/jbc.M109.033118
- 589 Goldstein I, Paakinaho V, Baek S, Sung M-H, Hager GL. 2017. Synergistic gene  
590 expression during the acute phase response is characterized by transcription factor  
591 assisted loading. *Nat Commun* **8**:1849. doi:10.1038/s41467-017-02055-5
- 592 Gu Z, Eils R, Schlesner M. 2016. Complex heatmaps reveal patterns and correlations in  
593 multidimensional genomic data. *Bioinformatics* **32**:2847–2849.  
594 doi:10.1093/bioinformatics/btw313
- 595 Heinz S, Benner C, Spann N, Bertolino E, Lin YC, Laslo P, Cheng JX, Murre C, Singh H,  
596 Glass CK. 2010. Simple combinations of lineage-determining transcription factors prime  
597 cis-regulatory elements required for macrophage and B cell identities. *Mol Cell* **38**:576–589.  
598 doi:10.1016/j.molcel.2010.05.004
- 599 Hinrichs AS, Karolchik D, Baertsch R, Barber GP, Bejerano G, Clawson H, Diekhans M,  
600 Furey TS, Harte RA, Hsu F, Hillman-Jackson J, Kuhn RM, Pedersen JS, Pohl A, Raney BJ,  
601 Rosenbloom KR, Siepel A, Smith KE, Sugnet CW, Sultan-Qurraie A, Thomas DJ,



- 602 Trumbower H, Weber RJ, Weirauch M, Zweig AS, Haussler D, Kent WJ. 2006. The UCSC  
603 Genome Browser Database: update 2006. *Nucleic Acids Res* **34**:D590-598.  
604 doi:10.1093/nar/gkj144
- 605 Ho L, Miller EL, Ronan JL, Ho WQ, Jothi R, Crabtree GR. 2011. esBAF facilitates  
606 pluripotency by conditioning the genome for LIF/STAT3 signalling and by regulating  
607 polycomb function. *Nature Cell Biology* **13**:903–913. doi:10.1038/ncb2285
- 608 Holland AJ, Fachinetti D, Han JS, Cleveland DW. 2012. Inducible, reversible system for the  
609 rapid and complete degradation of proteins in mammalian cells. *PNAS* **109**:E3350–E3357.  
610 doi:10.1073/pnas.1216880109
- 611 Hsiung CC-S, Morrissey CS, Udugama M, Frank CL, Keller CA, Baek S, Giardine B,  
612 Crawford GE, Sung M-H, Hardison RC, Blobel GA. 2015. Genome accessibility is widely  
613 preserved and locally modulated during mitosis. *Genome Res* **25**:213–225.  
614 doi:10.1101/gr.180646.114
- 615 Ishiuchi T, Ohishi H, Sato T, Kamimura S, Yorino M, Abe S, Suzuki A, Wakayama T,  
616 Suyama M, Sasaki H. 2019. Zfp281 Shapes the Transcriptome of Trophoblast Stem Cells  
617 and Is Essential for Placental Development. *Cell Rep* **27**:1742-1754.e6.  
618 doi:10.1016/j.celrep.2019.04.028
- 619 Iwafuchi-Doi M, Zaret KS. 2014. Pioneer transcription factors in cell reprogramming. *Genes*  
620 *Dev* **28**:2679–2692. doi:10.1101/gad.253443.114
- 621 Jacobs J, Atkins M, Davie K, Imrichova H, Romanelli L, Christiaens V, Hulselmans G,  
622 Potier D, Wouters J, Taskiran II, Paciello G, González-Blas CB, Koldere D, Aibar S, Halder  
623 G, Aerts S. 2018. The transcription factor Grainy head primes epithelial enhancers for  
624 spatiotemporal activation by displacing nucleosomes. *Nat Genet* **50**:1011–1020.  
625 doi:10.1038/s41588-018-0140-x
- 626 Kadauke S, Udugama MI, Pawlicki JM, Achtman JC, Jain DP, Cheng Y, Hardison RC,  
627 Blobel GA. 2012. Tissue-specific mitotic bookmarking by hematopoietic transcription factor  
628 GATA1. *Cell* **150**:725–737. doi:10.1016/j.cell.2012.06.038
- 629 Karwacki-Neisius V, Göke J, Osorno R, Halbritter F, Ng JH, Weiße AY, Wong FCK,  
630 Gagliardi A, Mullin NP, Festuccia N, Colby D, Tomlinson SR, Ng H-H, Chambers I. 2013.  
631 Reduced Oct4 Expression Directs a Robust Pluripotent State with Distinct Signaling Activity  
632 and Increased Enhancer Occupancy by Oct4 and Nanog. *Cell Stem Cell* **12**:531–545.  
633 doi:10.1016/j.stem.2013.04.023
- 634 Kent WJ, Sugnet CW, Furey TS, Roskin KM, Pringle TH, Zahler AM, Haussler D. 2002. The  
635 human genome browser at UCSC. *Genome Res* **12**:996–1006. doi:10.1101/gr.229102
- 636 Kepinski S, Leyser O. 2005. The Arabidopsis F-box protein TIR1 is an auxin receptor.  
637 *Nature* **435**:446–451. doi:10.1038/nature03542
- 638 Kim K-Y, Tanaka Y, Su J, Cakir B, Xiang Y, Patterson B, Ding J, Jung Y-W, Kim J-H,  
639 Hysolli E, Lee H, Dajani R, Kim J, Zhong M, Lee J-H, Skalnik D, Lim JM, Sullivan GJ, Wang  
640 J, Park I-H. 2018. Uhrf1 regulates active transcriptional marks at bivalent domains in  
641 pluripotent stem cells through Setd1a. *Nat Commun* **9**:2583. doi:10.1038/s41467-018-  
642 04818-0
- 643 King HW, Klose RJ. 2017. The pioneer factor OCT4 requires the chromatin remodeller  
644 BRG1 to support gene regulatory element function in mouse embryonic stem cells. *Elife* **6**.  
645 doi:10.7554/eLife.22631
- 646 Kumar V, Rayan NA, Muratani M, Lim S, Elanggovan B, Xin L, Lu T, Makhija H,  
647 Poschmann J, Lufkin T, Ng HH, Prabhakar S. 2016. Comprehensive benchmarking reveals  
648 H2BK20 acetylation as a distinctive signature of cell-state-specific enhancers and  
649 promoters. *Genome Res* **26**:612–623. doi:10.1101/gr.201038.115

- 650 Lawrence M, Huber W, Pagès H, Aboyoun P, Carlson M, Gentleman R, Morgan MT, Carey  
651 VJ. 2013. Software for computing and annotating genomic ranges. *PLoS Comput Biol*  
652 **9**:e1003118. doi:10.1371/journal.pcbi.1003118
- 653 Lee J, Go Y, Kang I, Han Y-M, Kim J. 2010. Oct-4 controls cell-cycle progression of  
654 embryonic stem cells. *Biochem J* **426**:171–181. doi:10.1042/BJ20091439
- 655 Li H, Handsaker B, Wysoker A, Fennell T, Ruan J, Homer N, Marth G, Abecasis G, Durbin  
656 R. 2009. The Sequence Alignment/Map format and SAMtools. *Bioinformatics* **25**:2078–  
657 2079. doi:10.1093/bioinformatics/btp352
- 658 Li S, Zheng EB, Zhao L, Liu S. 2019. Nonreciprocal and Conditional Cooperativity Directs  
659 the Pioneer Activity of Pluripotency Transcription Factors. *bioRxiv* 633826.  
660 doi:10.1101/633826
- 661 Liu Y, Pelham-Webb B, Di Giammartino DC, Li J, Kim D, Kita K, Saiz N, Garg V, Doane A,  
662 Giannakakou P, Hadjantonakis A-K, Elemento O, Apostolou E. 2017. Widespread Mitotic  
663 Bookmarking by Histone Marks and Transcription Factors in Pluripotent Stem Cells. *Cell*  
664 *Rep* **19**:1283–1293. doi:10.1016/j.celrep.2017.04.067
- 665 Liu Z, Kraus WL. 2017. Catalytic-Independent Functions of PARP-1 Determine Sox2  
666 Pioneer Activity at Intractable Genomic Loci. *Molecular Cell* **65**:589-603.e9.  
667 doi:10.1016/j.molcel.2017.01.017
- 668 Lukinavičius G, Umezawa K, Olivier N, Honigsmann A, Yang G, Plass T, Mueller V,  
669 Reymond L, Corrêa IR, Luo Z-G, Schultz C, Lemke EA, Heppenstall P, Eggeling C, Manley  
670 S, Johnsson K. 2013. A near-infrared fluorophore for live-cell super-resolution microscopy  
671 of cellular proteins. *Nat Chem* **5**:132–139. doi:10.1038/nchem.1546
- 672 Masui S, Nakatake Y, Toyooka Y, Shimosato D, Yagi R, Takahashi K, Okochi H, Okuda A,  
673 Matoba R, Sharov AA, Ko MS, Niwa H. 2007. Pluripotency governed by Sox2 via regulation  
674 of Oct3/4 expression in mouse embryonic stem cells. *Nature cell biology* **9**:625–35.  
675 doi:10.1038/ncb1589
- 676 Mayran A, Khetchoumian K, Hariri F, Pastinen T, Gauthier Y, Balsalobre A, Drouin J. 2018.  
677 Pioneer factor Pax7 deploys a stable enhancer repertoire for specification of cell fate. *Nat*  
678 *Genet* **50**:259–269. doi:10.1038/s41588-017-0035-2
- 679 Mayran A, Sochodolsky K, Khetchoumian K, Harris J, Gauthier Y, Bemmo A, Balsalobre A,  
680 Drouin J. 2019. Pioneer and nonpioneer cooperation drives lineage specific chromatin  
681 opening. *bioRxiv* 472647. doi:10.1101/472647
- 682 McDaniel SL, Gibson TJ, Schulz KN, Fernandez Garcia M, Nevil M, Jain SU, Lewis PW,  
683 Zaret KS, Harrison MM. 2019. Continued Activity of the Pioneer Factor Zelda Is Required to  
684 Drive Zygotic Genome Activation. *Mol Cell* **74**:185-195.e4.  
685 doi:10.1016/j.molcel.2019.01.014
- 686 Mei S, Qin Q, Wu Q, Sun H, Zheng R, Zang C, Zhu M, Wu J, Shi X, Taing L, Liu T, Brown  
687 M, Meyer CA, Liu XS. 2017. Cistrome Data Browser: a data portal for ChIP-Seq and  
688 chromatin accessibility data in human and mouse. *Nucleic Acids Res* **45**:D658–D662.  
689 doi:10.1093/nar/gkw983
- 690 Mistri TK, Arindrarto W, Ng WP, Wang C, Lim LH, Sun L, Chambers I, Wohland T, Robson  
691 P. 2018. Dynamic changes in Sox2 spatio-temporal expression promote the second cell  
692 fate decision through Fgf4/Fgfr2 signaling in preimplantation mouse embryos. *Biochem J*  
693 **475**:1075–1089. doi:10.1042/BCJ20170418
- 694 Mistri TK, Devasia AG, Chu LT, Ng WP, Halbritter F, Colby D, Martynoga B, Tomlinson SR,  
695 Chambers I, Robson P, Wohland T. 2015. Selective influence of Sox2 on POU transcription  
696 factor binding in embryonic and neural stem cells. *EMBO Rep* **16**:1177–1191.  
697 doi:10.15252/embr.201540467

- 698 Morawska M, Ulrich HD. 2013. An expanded tool kit for the auxin-inducible degron system  
699 in budding yeast. *Yeast* **30**:341–351. doi:10.1002/yea.2967
- 700 Nabet B, Roberts JM, Buckley DL, Paulk J, Dastjerdi S, Yang A, Leggett AL, Erb MA,  
701 Lawlor MA, Souza A, Scott TG, Vittori S, Perry JA, Qi J, Winter GE, Wong K-K, Gray NS,  
702 Bradner JE. 2018. The dTAG system for immediate and target-specific protein degradation.  
703 *Nat Chem Biol* **14**:431–441. doi:10.1038/s41589-018-0021-8
- 704 Nishimoto M, Fukushima A, Okuda A, Muramatsu M. 1999. The Gene for the Embryonic  
705 Stem Cell Coactivator UTF1 Carries a Regulatory Element Which Selectively Interacts with  
706 a Complex Composed of Oct-3/4 and Sox-2. *Molecular and Cellular Biology* **19**:5453–5465.  
707 doi:10.1128/MCB.19.8.5453
- 708 Nishimura K, Fukagawa T, Takisawa H, Kakimoto T, Kanemaki M. 2009. An auxin-based  
709 degron system for the rapid depletion of proteins in nonplant cells. *Nat Methods* **6**:917–922.  
710 doi:10.1038/nmeth.1401
- 711 Niwa H, Miyazaki J, Smith AG. 2000. Quantitative expression of Oct-3/4 defines  
712 differentiation, dedifferentiation or self-renewal of ES cells. *Nat Genet* **24**:372–376.  
713 doi:10.1038/74199
- 714 Nora EP, Goloborodko A, Valton A-L, Gibcus JH, Uebersohn A, Abdennur N, Dekker J,  
715 Mirny LA, Bruneau BG. 2017. Targeted Degradation of CTCF Decouples Local Insulation of  
716 Chromosome Domains from Genomic Compartmentalization. *Cell* **169**:930-944.e22.  
717 doi:10.1016/j.cell.2017.05.004
- 718 Oomen ME, Hansen AS, Liu Y, Darzacq X, Dekker J. 2019. CTCF sites display cell cycle–  
719 dependent dynamics in factor binding and nucleosome positioning. *Genome Res* **29**:236–  
720 249. doi:10.1101/gr.241547.118
- 721 Pastor WA, Liu W, Chen D, Ho J, Kim R, Hunt TJ, Lukianchikov A, Liu X, Polo JM,  
722 Jacobsen SE, Clark AT. 2018. TFAP2C regulates transcription in human naive pluripotency  
723 by opening enhancers. *Nat Cell Biol* **20**:553–564. doi:10.1038/s41556-018-0089-0
- 724 Pauklin S, Vallier L. 2013. The cell-cycle state of stem cells determines cell fate propensity.  
725 *Cell* **155**:135–47. doi:10.1016/j.cell.2013.08.031
- 726 Pintacuda G, Wei G, Roustan C, Kirmizitas BA, Solcan N, Cerase A, Castello A,  
727 Mohammed S, Moindrot B, Nesterova TB, Brockdorff N. 2017. hnRNPK Recruits PCGF3/5-  
728 PRC1 to the Xist RNA B-Repeat to Establish Polycomb-Mediated Chromosomal Silencing.  
729 *Mol Cell* **68**:955-969.e10. doi:10.1016/j.molcel.2017.11.013
- 730 Quinlan AR, Hall IM. 2010. BEDTools: a flexible suite of utilities for comparing genomic  
731 features. *Bioinformatics* **26**:841–842. doi:10.1093/bioinformatics/btq033
- 732 Raccaud M, Friman ET, Alber AB, Agarwal H, Deluz C, Kuhn T, Gebhardt JCM, Suter DM.  
733 2019. Mitotic chromosome binding predicts transcription factor properties in interphase. *Nat*  
734 *Commun* **10**:487. doi:10.1038/s41467-019-08417-5
- 735 Radzishchanskaya A, Chia GLB, dos Santos RL, Theunissen TW, Castro LFC, Nichols J,  
736 Silva JCR. 2013. A defined Oct4 level governs cell state transitions of pluripotency entry  
737 and differentiation into all embryonic lineages. *Nat Cell Biol* **15**:579–590.  
738 doi:10.1038/ncb2742
- 739 Ramírez F, Ryan DP, Grüning B, Bhardwaj V, Kilpert F, Richter AS, Heyne S, Dündar F,  
740 Manke T. 2016. deepTools2: a next generation web server for deep-sequencing data  
741 analysis. *Nucleic Acids Res* **44**:W160–W165. doi:10.1093/nar/gkw257
- 742 Rickels R, Herz H-M, Sze CC, Cao K, Morgan MA, Collings CK, Gause M, Takahashi Y-H,  
743 Wang L, Rendleman EJ, Marshall SA, Krueger A, Bartom ET, Piunti A, Smith ER, Abshiru  
744 NA, Kelleher NL, Dorsett D, Shilatifard A. 2017. Histone H3K4 monomethylation catalyzed

- 745 by Trr and mammalian COMPASS-like proteins at enhancers is dispensable for  
746 development and viability. *Nat Genet* **49**:1647–1653. doi:10.1038/ng.3965
- 747 Ritchie ME, Phipson B, Wu D, Hu Y, Law CW, Shi W, Smyth GK. 2015. limma powers  
748 differential expression analyses for RNA-sequencing and microarray studies. *Nucleic Acids*  
749 *Res* **43**:e47. doi:10.1093/nar/gkv007
- 750 Robinson MD, McCarthy DJ, Smyth GK. 2010. edgeR: a Bioconductor package for  
751 differential expression analysis of digital gene expression data. *Bioinformatics* **26**:139–140.  
752 doi:10.1093/bioinformatics/btp616
- 753 Sabari BR, Dall'Agnese A, Bojja A, Klein IA, Coffey EL, Shrinivas K, Abraham BJ, Hannett  
754 NM, Zamudio AV, Manteiga JC, Li CH, Guo YE, Day DS, Schuijers J, Vasile E, Malik S,  
755 Hnisz D, Lee TI, Cisse II, Roeder RG, Sharp PA, Chakraborty AK, Young RA. 2018.  
756 Coactivator condensation at super-enhancers links phase separation and gene control.  
757 *Science* **361**. doi:10.1126/science.aar3958
- 758 Schaffner W. 2015. Enhancers, enhancers - from their discovery to today's universe of  
759 transcription enhancers. *Biol Chem* **396**:311–327. doi:10.1515/hsz-2014-0303
- 760 Schindelin J, Arganda-Carreras I, Frise E, Kaynig V, Longair M, Pietzsch T, Preibisch S,  
761 Rueden C, Saalfeld S, Schmid B, Tinevez J-Y, White DJ, Hartenstein V, Eliceiri K,  
762 Tomancak P, Cardona A. 2012. Fiji: an open-source platform for biological-image analysis.  
763 *Nat Methods* **9**:676–682. doi:10.1038/nmeth.2019
- 764 Soufi A, Donahue G, Zaret KS. 2012. Facilitators and impediments of the pluripotency  
765 reprogramming factors' initial engagement with the genome. *Cell* **151**:994–1004.  
766 doi:10.1016/j.cell.2012.09.045
- 767 Soufi A, Garcia MF, Jaroszewicz A, Osman N, Pellegrini M, Zaret KS. 2015. Pioneer  
768 transcription factors target partial DNA motifs on nucleosomes to initiate reprogramming.  
769 *Cell* **161**:555–568. doi:10.1016/j.cell.2015.03.017
- 770 Stewart-Morgan KR, Reverón-Gómez N, Groth A. 2019. Transcription Restart Establishes  
771 Chromatin Accessibility after DNA Replication. *Molecular Cell*.  
772 doi:10.1016/j.molcel.2019.04.033
- 773 Strebinger D, Friman ET, Deluz C, Govindan S, Alber AB, Suter DM. 2019. Endogenous  
774 fluctuations of OCT4 and SOX2 bias pluripotent cell fate decisions. doi:10.1101/299073
- 775 Suter DM, Cartier L, Bettiol E, Tirefort D, Jaconi ME, Dubois-Dauphin M, Krause KH. 2006.  
776 Rapid generation of stable transgenic embryonic stem cell lines using modular lentivectors.  
777 *Stem Cells* **24**:615–23. doi:10.1634/stemcells.2005-0226
- 778 Swinstead EE, Paakinaho V, Presman DM, Hager GL. 2016. Pioneer factors and ATP-  
779 dependent chromatin remodeling factors interact dynamically: A new perspective: Multiple  
780 transcription factors can effect chromatin pioneer functions through dynamic interactions  
781 with ATP-dependent chromatin remodeling factors. *Bioessays* **38**:1150–1157.  
782 doi:10.1002/bies.201600137
- 783 Takaku M, Grimm SA, Shimbo T, Perera L, Menafra R, Stunnenberg HG, Archer TK,  
784 Machida S, Kurumizaka H, Wade PA. 2016. GATA3-dependent cellular reprogramming  
785 requires activation-domain dependent recruitment of a chromatin remodeler. *Genome Biol*  
786 **17**:36. doi:10.1186/s13059-016-0897-0
- 787 Teves SS, An L, Hansen AS, Xie L, Darzacq X, Tjian R. 2016. A dynamic mode of mitotic  
788 bookmarking by transcription factors. *Elife* **5**. doi:10.7554/eLife.22280
- 789 Wickham H. 2009. ggplot2: Elegant Graphics for Data Analysis, Use R! New York:  
790 Springer-Verlag.
- 791 Xiong J, Zhang Z, Chen J, Huang H, Xu Y, Ding X, Zheng Y, Nishinakamura R, Xu G-L,  
792 Wang H, Chen S, Gao S, Zhu B. 2016. Cooperative Action between SALL4A and TET

- 793 Proteins in Stepwise Oxidation of 5-Methylcytosine. *Mol Cell* **64**:913–925.  
794 doi:10.1016/j.molcel.2016.10.013
- 795 Xu J, Li J, Loh Y-HE, Zhang T, Jiang H, Fritzscht B, Ramakrishnan A, Shen L, Xu P-X.  
796 2018. Brg1 controls neurosensory cell fate commitment and differentiation in the  
797 mammalian inner ear. *bioRxiv* 434159. doi:10.1101/434159
- 798 Yang Y-G, Cortes U, Patnaik S, Jasin M, Wang Z-Q. 2004. Ablation of PARP-1 does not  
799 interfere with the repair of DNA double-strand breaks, but compromises the reactivation of  
800 stalled replication forks. *Oncogene* **23**:3872. doi:10.1038/sj.onc.1207491
- 801 Yuan H, Corbi N, Basilico C, Dailey L. 1995. Developmental-specific activity of the FGF-4  
802 enhancer requires the synergistic action of Sox2 and Oct-3. *Genes Dev* **9**:2635–2645.  
803 doi:10.1101/gad.9.21.2635
- 804 Zaret KS, Carroll JS. 2011. Pioneer transcription factors: establishing competence for gene  
805 expression. *Genes Dev* **25**:2227–2241. doi:10.1101/gad.176826.111
- 806 Zhang Y, Liu T, Meyer CA, Eeckhoutte J, Johnson DS, Bernstein BE, Nusbaum C, Myers  
807 RM, Brown M, Li W, Liu XS. 2008. Model-based analysis of ChIP-Seq (MACS). *Genome*  
808 *Biol* **9**:R137. doi:10.1186/gb-2008-9-9-r137

809

## 810 **Acknowledgments**

811 This work was supported by the Swiss National Science Foundation (grants  
812 #PP00P3\_179068 and PP00P3\_17205 to D.M.S.). A.C.A.M.F. was supported by a Marie  
813 Curie Intra European Fellowship within the 7th European Community Framework  
814 Programme. This work was further supported by AgingX (SystemsX.ch) and SNF  
815 (310030\_182655). We thank Bastien Mangeat, Elisa Cora, Paolo Ferrari, and Lionel  
816 Ponsonnet from the Gene Expression Core Facility for high-throughput sequencing, Miguel  
817 Garcia, Loïc Tauzin, Valérie Glutz, and André Mozes from the Flow Cytometry Core Facility  
818 for cell sorting, Olivier Burri and Romain Guet from the Bioimaging and Optics Platform for  
819 assistance with cell tracking, the staff at Vital-IT and SCITAS for cluster computing, and  
820 Armelle Tollenaere for critical reading of the manuscript.

821

## 822 **Author contributions**

823 D.M.S. and E.T.F. conceptualized the study and wrote the manuscript. E.T.F. performed  
824 the computational analysis. E.T.F., A.C.A.M.F., and C.D. performed ATAC-seq  
825 experiments. C.D. and E.T.F. performed ChIP-seq experiments. C.D. performed  
826 pluripotency assays, qRT-PCR, and immunofluorescence experiments. C.D. and S.G.

827 generated cell lines. V.G. consulted on the bioinformatic analysis. D.M.S. and B.D. provided  
828 funding and resources.

829

### 830 **Competing interests**

831 The authors have no competing interests to declare.

832

### 833 **Data availability**

834 All data are available upon demand. Sequencing data will be uploaded publicly upon  
835 publication.

836

### 837 **Methods**

#### 838 Cell culture

839 Mouse ES cells were routinely cultured on cell culture-treated dishes coated with 0.1%  
840 gelatin (Sigma #G9391-100G) using the following culture medium: GMEM (Sigma #G5154-  
841 500ML) containing 10% ES-cell qualified fetal bovine serum (Gibco #16141-079),  
842 nonessential amino acids (Gibco #11140-050), 2mM L-glutamine (Gibco #25030-024),  
843 sodium pyruvate (Sigma #S8636-100ML), 100 $\mu$ M 2-mercaptoethanol (Sigma #63689-  
844 25ML-F), penicillin and streptomycin (BioConcept #4-01F00-H), in-house produced  
845 leukemia inhibitory factor (LIF), CHIR99021 (Merck #361559-5MG) at 3 $\mu$ M and PD184352  
846 (Sigma #PZ0181-25MG) at 0.8 $\mu$ M. Cells were passaged by trypsinization (Sigma #T4049-  
847 100ML) every two to three days.

848

#### 849 Lentiviral vector production

850 Lentiviral vectors were produced by transfection of HEK 293T cells with the envelope  
851 (psPAX2, Addgene #12260), packaging (pMD2.G, Addgene #12259) (Dull et al., 1998), and  
852 lentiviral construct of interest using Calcium Phosphate transfection, as described  
853 previously (Suter et al., 2006). Viral vectors were concentrated 120-fold by  
854 ultracentrifugation at 20'000 rpm for 90 minutes at 4°C. 50'000 cells in 1 ml of medium in a

855 24-well plate were transduced with 50  $\mu$ l of concentrated lentiviral vector particles to  
856 generate stable cell lines.

857

#### 858 Cloning of overexpression constructs

859 pLV-PGK-YPet-MD was derived from pLVTRE3G-Sox2-YPet-MD (Deluz et al., 2016) by  
860 amplification of YPet-MD and restriction cloning into pLV-rtTA3G-IRESBsd using AgeI and  
861 Sall. pLV-PGK-SNAP-MD-OCT4 and pLV-PGK-SNAP-MD\*-OCT4 were derived by  
862 amplification of MD or MD\* from SNAP-MD-SOX2 (Addgene #115687) and SNAP-MD\*-  
863 SOX2 (Addgene #115688) (Deluz et al., 2016) and restriction cloning into pLVTRE3G-  
864 Oct4-YPet (Deluz et al., 2016) using Sall and XbaI. SNAP-MD-OCT4 and SNAP-MD\*-  
865 OCT4 were further amplified and cloned by restriction cloning into pLV-rtTA3G-IRESBsd  
866 (Deluz et al., 2016) using AgeI and Sall. pLEX-mCherry-OCT4-AID was derived by  
867 amplification of OCT4 from pLV-PGK-SNAP-MD-OCT4, AID 71-114 from pEN244  
868 (Addgene #92140) (Nora 2017), and mCherry from pLV-TRE3G-mCherry-PGK-Puro (Suter  
869 lab). mCherry and OCT4 were ligated using an XmaI restriction site and mCherry-OCT4  
870 was ligated to AID using a KpnI restriction site. The mCherry-OCT4-AID fragment was  
871 cloned into the pLEX\_305-C-dTAG backbone (Addgene #91798) (Nabet et al., 2018) using  
872 EcoRV and MluI restriction sites. pLV-pCAGGS-Tir1-V5 was derived by amplification of  
873 pCAGGS-Tir1-V5 from pEN395 (Addgene #92141) (Nora et al., 2017) and In-fusion cloning  
874 into pLV-PGK-SOX2-SNAP-IRES-Hygro (Strebinger et al., 2019) digested using XhoI and  
875 XbaI restriction enzymes.

876

#### 877 Generation of stable cell lines

878 To generate MD-OCT4 cell lines, ZHBTc4 cells were transduced with SNAP-MD-OCT4 and  
879 SNAP-MD\*-OCT4 lentiviral vector particles and sorted to display near-identical average  
880 SNAP levels (Fig. S6A), subsequently transduced with PGK-YPet-MD lentiviral vector  
881 particles, and sorted to display near-identical average YPet-MD levels. To generate the  
882 OCT4-AID cell line, ZHBTc4 cells were transduced with pLV-pCAGGS-Tir1-V5 and PLEX-

883 mCherry-OCT4-AID packaged lentiviral vectors (i.e Tir1-V5 and mCherry-Oct4-AID virus,  
884 respectively) and were selected with 2  $\mu\text{g/ml}$  Puromycin (Thermo Fisher Scientific  
885 #A1113803) for 10 days. Subsequently, mCherry positive cells were sorted and transduced  
886 with PGK-YPet-MD lentiviral particles and sorted for YPet positive cells. Cells that  
887 displayed IAA-dependent degradation were selected by sorting a narrow window of  
888 mCherry-positive cells, followed by treatment with 500 nM IAA (Sigma #I5148-2G) for 1  
889 hour, and sorting for mCherry-negative cells. All cell lines were maintained in medium  
890 without dox (Sigma #D3447-500MG) or IAA prior to experiments.

891

#### 892 Treatment conditions

893 ZHBTc4 YPet-MD SNAP-MD-OCT4 and SNAP-MD\*-OCT4 were treated with 1  $\mu\text{g/ml}$  dox  
894 for 40 hours prior to cell sorting. ZHBTc4 YPet-MD TIR1-V5 mCherry-OCT4-AID cells were  
895 treated with 1  $\mu\text{g/ml}$  dox for 24 hours before adding IAA. Dox was maintained throughout  
896 the experiment. Cells were treated with 500 nM IAA (or not for control) for 2 hours or  
897 treated with 500 nM IAA (or not for control) for 2.5 hours, washed 5 times with PBS with 2  
898 minutes incubation, and placed back in medium containing 1  $\mu\text{g/ml}$  dox for 4.5 hours. For  
899 the time course experiment, OCT4-AID cells were seeded in different wells of a 24-well  
900 plate and treated with dox for 24 hours before adding IAA. Dox was maintained throughout  
901 the experiment. IAA was added at different time points (with one well left untreated) prior to  
902 cell collection. All wells were collected at the same time and subjected to ATAC-seq as  
903 described below.

904

#### 905 Cell cycle phase sorting

906 Cells were trypsinized, resuspended in culture medium with 50  $\mu\text{M}$  Hoechst33342 (Thermo  
907 Fisher Scientific #H3570), and incubated for 15 minutes at 37°C. Cells were then spun  
908 down, resuspended in cold PBS with 1% FBS, and sorted according to their YPet-MD and  
909 Hoechst profile (Fig. S6B). Cells were sorted at 4°C into 1.5 ml Eppendorf tubes or 15 ml



910 Falcon tubes containing a small amount of PBS with 1% FBS. Sorting for SNAP levels was  
911 done on a MoFlo Astrios (Beckman Coulter). All other sorting was done on a FACSAria II  
912 or a FACSAria Fusion (BD Biosciences).

913

#### 914 ATAC-seq

915 All ATAC-seq experiments were performed in biological duplicates. 50'000 cells were  
916 collected either directly after trypsinization or after sorting as described above and  
917 subjected to ATAC-seq as described previously (Buenrostro et al., 2013). All centrifugation  
918 steps were done at 800g at 4°C. Briefly, cells were centrifuged for 5 minutes and washed  
919 with cold PBS, then centrifuged for 5 minutes and resuspended in cold lysis buffer (10 mM  
920 Tris-HCl pH 7.4, 10 mM NaCl, 3 mM MgCl<sub>2</sub>, 0.1% NP-40), and centrifuged for 10 minutes.  
921 Subsequently, nuclei were resuspended in a solution of 0.5 μM Tn5 (in-house preparation  
922 according to (Chen et al., 2017)) in TAPS-DMF buffer (10 mM TAPS-NaOH, 5 mM MgCl<sub>2</sub>,  
923 10% DMF) and incubated for 30 minutes at 37°C. DNA was immediately purified using  
924 column purification (Zymo #D4004) and eluted in 10 μl nuclease-free H<sub>2</sub>O. Transposed  
925 DNA was amplified in a solution containing 1X NEBNextHigh Fidelity PCR Master Mix (NEB  
926 #M0541L), 0.5 μM of Ad1\_noMX universal primer, 0.5 μM of Ad2.x indexing primer and  
927 0.6x SYBR Green I (Thermo Fisher Scientific #S7585) using 72°C for 5 minutes, 98°C for  
928 30 s, and 5 cycles of 98°C for 1s, 63°C for 30s, and 72°C for 60s. 10 μl of amplified DNA  
929 was analyzed by qPCR to determine the total number of cycles to avoid amplification  
930 saturation and accordingly amplified with additional 3-7 cycles of 98°C for 10s, 63°C for  
931 30s, and 72°C for 60s. DNA was purified using column purification (Zymo #D4004) and  
932 size-selected by taking the unbound fraction of 0.55X AMPure XP beads (Beckman Coulter  
933 #A63880) followed by the bound fraction of 1.2X AMPure XP beads. Libraries were  
934 sequenced on an Illumina NextSeq 500 using 75 nucleotide read-length paired-end  
935 sequencing.

936

937 ChIP-seq

938 All ChIP-seq experiments were performed in biological duplicates. Roughly 10 million cells  
939 per sample were collected after trypsinization and fixed with 2 mM disuccinimidyl glutarate  
940 (Thermo Fisher Scientific #20593) in PBS for 50 minutes at room temperature, spun down  
941 at 600g for 5 minutes and washed once with PBS. Cells were then treated with 1%  
942 formaldehyde (Axon Lab #A0877,0500) for 10 minutes at room temperature and quenched  
943 with 200mM Tris-HCl pH 8.0 for 10 minutes, washed with PBS and spun down. For  
944 ZHBTc4 YPet-MD SNAP-MD-OCT4 and SNAP-MD\*-OCT4 cells, cells were subsequently  
945 resuspended in cold PBS with 1% FBS and at least 500'000 cells per cell cycle phase were  
946 sorted. Fixed cell pellets were kept on ice and resuspended in LB1 (50mM HEPES-KOH pH  
947 7.4, 140mM NaCl, 1 mM EDTA, 0.5mM EGTA, 10% Glycerol, 0.5% NP-40, 0.25% Triton X-  
948 100), incubated 10 min at 4°C, spun down at 1700g, and resuspended in LB1 a second  
949 time, spun down and resuspended in LB2 (10mM Tris-HCl pH 8.0, 200mM NaCl, 1 mM  
950 EDTA, 0.5mM EGTA), incubated for 10 min at 4°C, spun down and washed without  
951 disturbing the pellet three times with SDS shearing buffer (10mM Tris-HCl pH 8.0, 1mM  
952 EDTA, 0.15% SDS) and finally resuspended in SDS shearing buffer. All buffers contained  
953 Protease Inhibitor Cocktail (Sigma #P8340-1ML) at 1:100 dilution. Chromatin was sonicated  
954 for 20 min at 5% duty cycle, 140 W, 200 cycles on a Covaris E220 focused ultrasonicator.  
955 Sonicated chromatin was equilibrated to 1% Triton X-100 and 150 mM NaCl and incubated  
956 with each antibody overnight at 4°C. Antibodies used were anti-BRG1 (Abcam #ab110641)  
957 at 5 µg per 10 million cells, anti-OCT4 (Cell Signaling Technology #5677S) at 20 µl per 10  
958 million cells, and anti-H3K27ac (abcam #ab4729) at 2 µg/25 µg chromatin. Protein G  
959 Dynabeads (Thermo Fisher Scientific #10003D) were blocked with 5 mg/ml BSA in PBS,  
960 added to chromatin, and incubated at 4°C for 3 hours. Beads were washed twice with Low  
961 Salt wash buffer (10mM Tris-HCl pH 8.0, 150mM NaCl, 1 mM EDTA, 1% Triton X-100,  
962 0.15% SDS, 1 mM PMSF), once with High Salt wash buffer (10mM Tris-HCl pH 8.0,  
963 500mM NaCl, 1 mM EDTA, 1% Triton X-100, 0.15% SDS, 1 mM PMSF), once with LiCl  
964 wash buffer (10mM Tris-HCl pH 8.0, 1mM EDTA, 0.5mM EGTA, 250mM LiCl, 1% NP40,

965 1% sodium deoxycholate, 1mM PMSF), and finally with 1X TE (10 mM Tris pH 8.0, 1 mM  
966 EDTA) before being resuspended in ChIP Elution buffer (10 mM Tris pH 8.0, 1 mM EDTA,  
967 1% SDS, 150 mM NaCl) with 400 ng/μl Proteinase K (Qiagen #19131) and reverse-  
968 crosslinked overnight at 65°C. DNA was purified using a MinElute PCR purification kit  
969 (Qiagen #28004) and libraries were prepared with the NEBNext Ultra II DNA Library Prep  
970 Kit (NEB #E7645S). Libraries were sequenced on an Illumina NextSeq 500 using 75-  
971 nucleotide read length paired-end sequencing.

972

### 973 Pluripotency assays and qRT-PCR

974 ZHBTc4 YPET-MD cells expressing SNAP-MD-OCT4 or SNAP-MD\*-OCT4 were plated at  
975 400 cells per well in a 6-well plate with ES cell medium (see above) with 0 or 1 μg/ml dox  
976 and medium was refreshed every other day. At day 8, flat and dome-shaped colonies were  
977 scored according to morphology followed by alkaline phosphatase staining (Sigma #86R-  
978 1KT). For qRT-PCR experiments, cells were collected at day 8 and RNA was extracted  
979 using GenElute Mammalian Total RNA MiniPrep Kit (Sigma #RTN350). cDNA was  
980 synthesized using oligodT primers using SuperScript II Reverse Transcriptase (Thermo  
981 Fisher Scientific #18064014). qPCR was performed on a 7900HT (Applied Biosystems).

982

### 983 Immunofluorescence microscopy

984 2TS22C and ZHBTc4 cells were plated in a 96-well plate coated for 1 hour at 37°C with  
985 1:25 diluted StemAdhere (Primorigen Biosciences #S2071-500UG), treated with 1 μg/ml  
986 dox for different durations and fixed with 2% formaldehyde for 30 minutes at room  
987 temperature, washed with PBS, permeabilized with PBS with 5% FBS and 0.5% Triton X-  
988 100 for 30 minutes at room temperature, and incubated with the primary antibody, anti-  
989 OCT4 C-10 (Santa Cruz #sc-5279) at 1:500 dilution and anti-SOX2 (ThermoFisher #48-  
990 1400) at 1:200 dilution, in PBS with 5% FBS and 0.1% Triton X-100 at 4°C overnight. After  
991 washing with PBS, cells were incubated with the secondary antibody, anti-Mouse IgG

992 AF488 (Thermo Fisher Scientific #A28175) and anti-Rabbit IgG AF647 (Thermo Fisher  
993 Scientific #A27040) at 1:1000, in PBS with 5% FBS and 0.1% Triton X-100 for 60 minutes  
994 at room temperature, with 2 ng/ml DAPI (Thermo Fisher Scientific #62248) for 10 minutes  
995 at room temperature and subsequently washed and imaged on an IN Cell Analyzer 2200  
996 (GE Healthcare). Images were background-subtracted using Fiji (Schindelin et al., 2012)  
997 with a rolling ball radius of 50 pixels and analyzed using CellProfiler (Carpenter et al.,  
998 2006). Nuclei were identified using the Watershed module on the DAPI channel, objects  
999 that were too large or too small were discarded, and the integrated intensity in the OCT4  
1000 and SOX2 channels was measured within the identified nuclei.

1001

#### 1002 Time-lapse microscopy

1003 ZHBTc4 YPet-MD TIR1-V5 mCherry-OCT4-AID cells were plated in a 96-well plate coated  
1004 for 1 hour at 37°C with 1:25 diluted StemAdhere (Primorigen Biosciences #S2071-500UG)  
1005 and imaged on an IN Cell Analyzer 2200 (GE Healthcare) using the TexasRed and  
1006 Brightfield channels. Cells were treated with IAA or washed just prior to imaging. Images  
1007 were background-subtracted using Fiji (Schindelin et al., 2012) with a rolling ball radius of  
1008 50 pixels and nuclei were tracked manually over time using the Manual Tracking plugin in  
1009 Fiji in the Brightfield channel. The mean signal in 10 pixels around the tracked spot were  
1010 measured in the TexasRed channel and the mean background signal at an equivalent sized  
1011 spot free from cells (background) was subtracted at each time point.

1012

#### 1013 Data analysis for ATAC-seq and ChIP-seq

1014 All sequencing libraries were aligned to the mm10 Mus musculus genome (GRCm38) with  
1015 STAR 2.6.1c (Dobin et al., 2013) and duplicate reads were removed using Picard (Broad  
1016 Institute). Reads not mapping to chromosomes 1-19, X, or Y were removed. Peaks were  
1017 called with MACS 2.1.1.20160309 (Zhang et al., 2008) with settings '-f BAMPE -g mm'. For  
1018 comparative analysis of ZHBTc4 and 2TS22C cells, all peaks from ZHBTc4 and 2TS22C  
1019 ATAC-seq experiments were merged with BEDTools (Quinlan and Hall, 2010). For MD-

1020 OCT4 and OCT4-AID analyses, all peaks from ATAC-seq experiments in the corresponding  
1021 cell lines were merged. For MD-OCT4 H3K27ac analysis, peak coordinates were expanded  
1022 by 500 bp on both sides to account for the enrichment profile of H3K27ac. All peaks larger  
1023 than 5 kb, overlapping peaks called in Input (no immunoprecipitation) samples from ES  
1024 cells in S2iL (GSE89599) or SL (GSE87822), or overlapping blacklisted peaks (ENCODE  
1025 Project Consortium, 2012) were removed. The HOMER2 (Heinz et al., 2010) functions  
1026 makeTagDirectory and annotatePeaks.pl with settings '-noadj -len 0 -size given' were used  
1027 for read counting and count tables were loaded into RStudio. TMM Normalization was done  
1028 with edgeR (Robinson et al., 2010) and analysis of differentially accessible regions was  
1029 done with limma (Ritchie et al., 2015). Contrasts were designed as  
1030 ~0+Condition+Replicate, where Condition specifies the cell line and treatment and  
1031 Replicate the date of the experiment, to take into account the paired nature of the  
1032 experiments. For comparing unpaired experiments, i.e. untreated ZHBTc4 vs 2TS22C cell  
1033 lines or untreated ZHBTc4 in SL versus S2iL, ~0+Condition was used. For Fig. S8A-B, the  
1034 mean of the TMM-normalized reads in the ChIP-seq and ATAC-seq replicates was divided  
1035 by the nucleotide length of each region. For Figures 5C-F, the mean of the TMM-  
1036 normalized reads in the replicates was used. The HOMER2 function findMotifsGenome.pl  
1037 was used with the setting '-size given' for motif searching. The most frequent known motif in  
1038 target regions of a given class of known motifs (i.e. different versions of SOX and OCT  
1039 motifs) was used. Background was calculated as the mean of HOMER-estimated  
1040 background frequency in all groups/clusters. Only motifs with  $\log P < -50$  are shown in  
1041 Tables 1-3. For GO analysis, the closest Entrez gene entry TSS to each region in groups  
1042 was used and enrichment was calculated using the HOMER2 function findGO.pl with  
1043 setting 'mouse'. Gene names were converted between assemblies using biomaRt (Durinck  
1044 et al., 2005). Replicate bam files were merged using SAMTools (Li et al., 2009) and  
1045 converted to bigWig files using the deepTools 3.1.3 (Ramírez et al., 2016) function  
1046 bamCoverage with settings '--normalizeUsingRPKM'. Average lineplots were generated  
1047 using deepTools computeMatrix (with setting 'reference-point') and custom R code.

1048 Heatmaps were generated using the deepTools function plotHeatmap. Genome tracks  
1049 were made in the UCSC genome browser (Kent et al., 2002). Plots were generated using  
1050 ggplot2 (Wickham, 2009). Overlap between genomic regions was determined using  
1051 GenomicRanges (Lawrence et al., 2013). The heatmap in Fig. 1C was generated using  
1052 ComplexHeatmap (Gu et al., 2016). Color schemes were taken from colorbrewer2.org and  
1053 <https://rpubs.com/Koundy/71792>.

1054

#### 1055 Published datasets

1056 Published data in Table 4 were aligned and processed as described above. Processed  
1057 bigWig files in Table 5 were downloaded from GEO (Edgar et al., 2002) or cistromeDB (Mei  
1058 et al., 2017). When necessary, peak files were converted to mm9 using liftOver (Hinrichs et  
1059 al., 2006). OCT4 and SOX2 ChIP-seq peaks were derived from newly generated (2TS22C  
1060 OCT4) and published (ZHBTc4 OCT4 and SOX2) (King and Klose, 2017) datasets as  
1061 described above as well as from processed SOX2 ChIP-seq peaks from asynchronous E14  
1062 cells (GSE89599) (Deluz et al., 2016) and merged with BEDTools (Quinlan and Hall, 2010).  
1063 Super-enhancer and typical enhancers were taken from (Sabari et al., 2018) and converted  
1064 to mm10 using liftOver (Hinrichs et al., 2006). ChromHMM tracks from mouse ES cells  
1065 were downloaded from [https://github.com/guifengwei/ChromHMM\\_mESC\\_mm10](https://github.com/guifengwei/ChromHMM_mESC_mm10)  
1066 (Pintacuda et al., 2017). ATAC-seq data from OCT4 high and OCT4 low sorted cells were  
1067 taken from a previous study (Strebinger et al., 2019) and processed as described above,  
1068 merging SHOH and SLOH samples into OCT4 high and SLOL and SHOL samples into  
1069 OCT4 low.

1070

#### 1071 K-means clustering

1072 Clusters in Fig. 3D were generated using the R function pheatmap with settings  
1073 'clustering\_distance\_rows = "euclidean", kmeans\_k = 4' on a matrix containing the log2  
1074 fold-change values in accessibility between MD-OCT4 and MD\*-OCT4 at each cell cycle

1075 phase (columns) at each OCT4-bound locus (rows). Clusters were ordered according to the  
1076 lowest mean log<sub>2</sub> fold-change in EG1.

1077

#### 1078 Exponential curve fitting

1079 Exponential decays were fitted using the R function nls with the formula  $y \sim a * e^{(-b * x)} + c$   
1080 where a, b, and c are constants. Half-life values were derived as  $\log(2)/b$ .

1081

#### 1082 **Supplementary figure and table legends**

1083 **Supplementary Figure 1.** (A) Immunofluorescence of 2TS22C cells stained for DNA  
1084 (DAPI), OCT4, and SOX2 without dox treatment (left), and after 26 hours (middle), and 40  
1085 hours (right) of dox treatment. (B) Violin plot of background-subtracted log values of  
1086 immunofluorescence signal in OCT4 (left) and SOX2 (right) channels upon SOX2 depletion.  
1087 Control: n=45'601 cells from 4 biological replicates including 2 technical replicates; 26  
1088 hours: n=42'298 cells from 3 biological replicates including 2 technical replicates; 40 hours:  
1089 n= 32'342 cells from 2 technical replicates. Dots: mean; Vertical lines: standard deviation.  
1090 (C) Immunofluorescence of ZHBTc4 cells stained for DNA (DAPI), OCT4, and SOX2  
1091 without dox treatment (left), and after 24 hours of dox treatment (right). (D) Violin plot of  
1092 background-subtracted log values of immunofluorescence signal in OCT4 (left) and SOX2  
1093 (right) channels upon OCT4 depletion. Control: n=26'119 cells from 3 biological replicates.  
1094 24 hours: n=23'157 cells from 3 biological replicates. Dots: mean; Vertical lines: standard  
1095 deviation. (E) Correlation between the log<sub>2</sub> fold-change values of accessibility upon OCT4  
1096 depletion in S2iL (x-axis) and SL (y-axis) at OCT4-bound sites. (F) Correlation between the  
1097 log<sub>2</sub> fold-change values of accessibility upon SOX2 depletion after 26 hours (x-axis) and 40  
1098 hours (y-axis) of dox treatment at SOX2 binding sites. R is Pearson correlation coefficient.  
1099 Scale bars: 30 μm.

1100

#### 1101 **Supplementary Figure 2.** Heatmaps of RPKM-normalized ATAC-seq and ChIP-seq

1102 binding profiles upon OCT4 (A) and SOX2 (B) depletion 5 kb around OCT4-regulated (A)

1103 and SOX2-regulated (B) loci. Each row represents one individual locus and each column  
1104 represents one experimental condition.

1105

1106 **Supplementary Figure 3.** (A) Classification of all OCT4 and SOX2 binding sites into OD,  
1107 CD, and SD loci as well as loci that were discarded due to differences in untreated cells  
1108 between conditions or cell lines (Discarded), due to incongruent effect on accessibility after  
1109 depletion in different conditions (Incongruent) and those that were unaffected by depletion.  
1110 (B) ChromHMM signal enrichment at OD, CD, and SD loci as well as loci that were  
1111 unaffected by depletion or not bound by OCT4 or SOX2.

1112

1113 **Supplementary Figure 4.** (A) Average ATAC-seq signal 2 kb around OD, CD, and SD loci  
1114 in BRG1fl cells that were treated with tamoxifen (TAM) or left untreated. (B) Frequency of  
1115 the AP-2 motif 2 kb around OD, CD, and SD loci, and in background regions (BG). (C)  
1116 Average SOX2 ChIP-seq signal in TS cells 2 kb around OD, CD, and SD loci. (D) Average  
1117 ATAC-seq signal in TS cells 2 kb around OD, CD, and SD loci. (E) Percentage of the  
1118 closest gene in the OD, CD, and SD groups as well as all other accessible regions (Other)  
1119 whose nascent RNA levels are downregulated or upregulated upon 24 hours of OCT4  
1120 depletion (F) Average ChIP-seq signal of ESRRB, NANOG, KLF4, and SALL4 in ES cells 2  
1121 kb around OD, CD, and SD loci. (G) Enrichment ( $-\log(p)$ ) values for the closest gene in the  
1122 OD, CD, and SD groups in the “Cell differentiation” gene ontology set. (H) SOX2 binding  
1123 profiles 2 kb around OD, CD, and SD loci in wt and PARP1 KO ES cells.

1124

1125 **Supplementary Figure 5.** (A) Correlation between  $\log_2$  fold-change values of accessibility  
1126 (x-axis) and OCT4 binding (y-axis) upon SOX2 depletion in 2TS22C cells with dox  
1127 treatment for 26 hours. R is Pearson correlation coefficient. (B-C) Average RPKM-  
1128 normalized ATAC-seq signal 2 kb around OD (n=3'730), CD (n=1'463), and SD (n=273) loci  
1129 that overlap with a canonical OCT4::SOX2 motif upon SOX2 (B) and OCT4 (C) depletion.  
1130 (D-E) Average RPKM-normalized OCT4 (D) and SOX2 (E) ChIP-seq signal 2 kb around



1131 OD, CD, and SD loci that overlap with a canonical OCT4::SOX2 motif upon SOX2 (D) and  
1132 OCT4 (E) depletion. (F) Average RPKM-normalized ATAC-seq signal upon SOX2 depletion  
1133 2 kb around loci that display a significant increase in accessibility and SOX2 binding upon  
1134 OCT4 depletion. (G) Average RPKM-normalized BRG1 ChIP-seq signal upon OCT4  
1135 depletion 2 kb around loci that display a significant increase in accessibility and SOX2  
1136 binding upon OCT4 depletion.

1137

1138 **Supplementary Figure 6.** (A) Gate used to sort SNAP-MD-OCT4 (left) and SNAP-MD\*-  
1139 OCT4 (right) cells for the same average SNAP-Cell 647-SiR signal. Y-axis: Signal  
1140 amplitude at 405 nm excitation and 526/52 nm emission (negative control). X-axis: Signal  
1141 amplitude at 640 nm excitation and 671/30 nm emission (SNAP signal). (B) Example of a  
1142 sorting experiment for different phases of the cell cycle in cells expressing YPet-MD and  
1143 stained for Hoechst33258. Y-axis: Integrated signal at 488 nm excitation and 525/50 nm  
1144 emission (YPet). X-axis: Signal amplitude at 355 nm excitation and 450/50 nm emission  
1145 (Hoechst) (C) Correlation between YPet-MD and SNAP-MD-OCT4 expression in MD-OCT4  
1146 cells as measured by flow cytometry. Y-axis: Integrated signal at 640 nm excitation and  
1147 670/14 nm emission (SNAP). X-axis: Integrated signal at 488 nm excitation and 525/50 nm  
1148 emission (YPet). (D) Violin plot of log<sub>2</sub> fold-change values of accessibility between MD-  
1149 OCT4 and MD\*-OCT4 cells in significantly downregulated and upregulated loci (see Fig.  
1150 1B) in unsorted cells in the absence of dox. Dots: mean; Vertical lines: standard deviation.  
1151 (E) Percentage of dome-shaped colonies as assessed by microscopy in the ZHBTc4 cell  
1152 line upon dox treatment and with overexpression of SNAP-MD\*-OCT4 or SNAP-MD-OCT4.  
1153 n=3 biological replicates. (F) Representative alkaline phosphatase staining from cells in (E).  
1154 (G) Fold-change of expression levels of differentiation markers (Dlx3, Eomes and Esx1)  
1155 and Nanog, measured by qRT-PCR in dox-treated versus untreated cells, in MD-OCT4 and  
1156 MD\*-OCT4 cells. Each sample is normalized to the expression of Rps9. n=4 biological  
1157 replicates. (H) Percentage of cells in EG1/LG1/S/SG2 phases as determined by flow  
1158 cytometry in MD-OCT4 and MD\*-OCT4 cells. n=4 biological replicates. (I-J) Violin plot of

1159 log<sub>2</sub> fold-change values of accessibility between MD-OCT4 and MD\*-OCT4 cells in  
1160 different cell cycle phases at significantly downregulated (I) and upregulated (J) loci (see  
1161 Fig. 1B). Dots: mean; Vertical lines: standard deviation.

1162

1163 **Supplementary Figure 7.** (A) Violin plot of distance to closest TSS in clusters from Fig.  
1164 3D. Dots: mean; Vertical lines: standard deviation. (B) Heatmap of ChIP-seq signal of  
1165 H3K4me<sub>3</sub>, H3K4me<sub>1</sub>, and H3K27ac in wt ES cells in the different clusters. (C) Average  
1166 log<sub>2</sub> fold-change values of H3K27ac ChIP-seq signal between MD-OCT4 and MD\*-OCT4  
1167 cells in the different clusters (including 500bp flanking regions at each side) at different cell  
1168 cycle stages. (D) Genome browser tracks of RPKM-normalized H3K27ac profiles across  
1169 the cell cycle for a cluster 1 locus (chr11:6894809-6895533) that decreases in accessibility  
1170 and H3K27ac upon transient OCT4 depletion in M-G1. (E) Percentage of loci in the  
1171 different clusters and at non-OCT4 bound regions overlapping typical enhancers (TE) and  
1172 super-enhancers (SE) in mouse ES cells. (F) ATAC-seq signal in cells sorted for high and  
1173 low endogenous OCT4 levels in the different clusters. (G) Percentage of loci in the different  
1174 clusters overlapping OD, CD, and SD loci (see Fig. 1C).

1175

1176 **Supplementary Figure 8.** (A) Correlation between the log of normalized OCT4 ChIP-seq  
1177 reads per bp (x-axis) and the log<sub>2</sub> fold-change values of accessibility loss upon OCT4  
1178 depletion (y-axis) at all OCT4 binding sites in ZHBTc4 cells. (B) Correlation between the log  
1179 of normalized OCT4 ChIP-seq reads per bp (x-axis) and the log of normalized ATAC-seq  
1180 reads per bp (y-axis) at all OCT4 binding sites in ZHBTc4 cells. R is Pearson correlation  
1181 coefficient.

1182

1183 **Supplementary Figure 9.** (A) Histogram of mCherry signal in untreated mCherry OCT4-  
1184 AID cells and treated with IAA for 2 hours as well as mCherry negative E14 ES cells as  
1185 measured by flow cytometry. X-axis: Integrated signal at 561 nm excitation and 610/20 nm  
1186 emission. Y-axis: Counts. (B-D) Fold-change of red fluorescence (mCherry) signal between

1187 treated and untreated mCherry-OCT4-AID cells as determined by flow cytometry in different  
1188 cell cycle phases upon 2 h IAA treatment (B), 0.5 h IAA treatment (C), and after 2.5 h IAA  
1189 treatment followed by 4.5 h of washout (D). n=3 biological replicates. (E-F) Genome  
1190 browser tracks of accessibility profiles of a cluster 1 locus at chr10:95455826-95456819  
1191 after IAA treatment (E) and after IAA treatment followed by washout (F).

1192

1193 **Table 1.** Enrichment (logP) and frequency of known motifs from HOMER in the sequences  
1194 of OD, CD, and SD loci.

1195

1196 **Table 2.** Enrichment (logP) and frequency of known motifs from HOMER in the sequences  
1197 of loci gaining accessibility upon loss of OCT4 (OCT4up) and SOX2 (SOX2up).

1198

1199 **Table 3.** Enrichment (logP) and frequency of known motifs from HOMER in the sequences  
1200 of the different clusters in Fig. 3D.

1201

1202 **Table 4.** Description of publicly available data used in this study that was aligned and  
1203 processed according to the Methods section.

1204

1205 **Table 5.** Description of publicly available pre-processed data used in this study.

1206

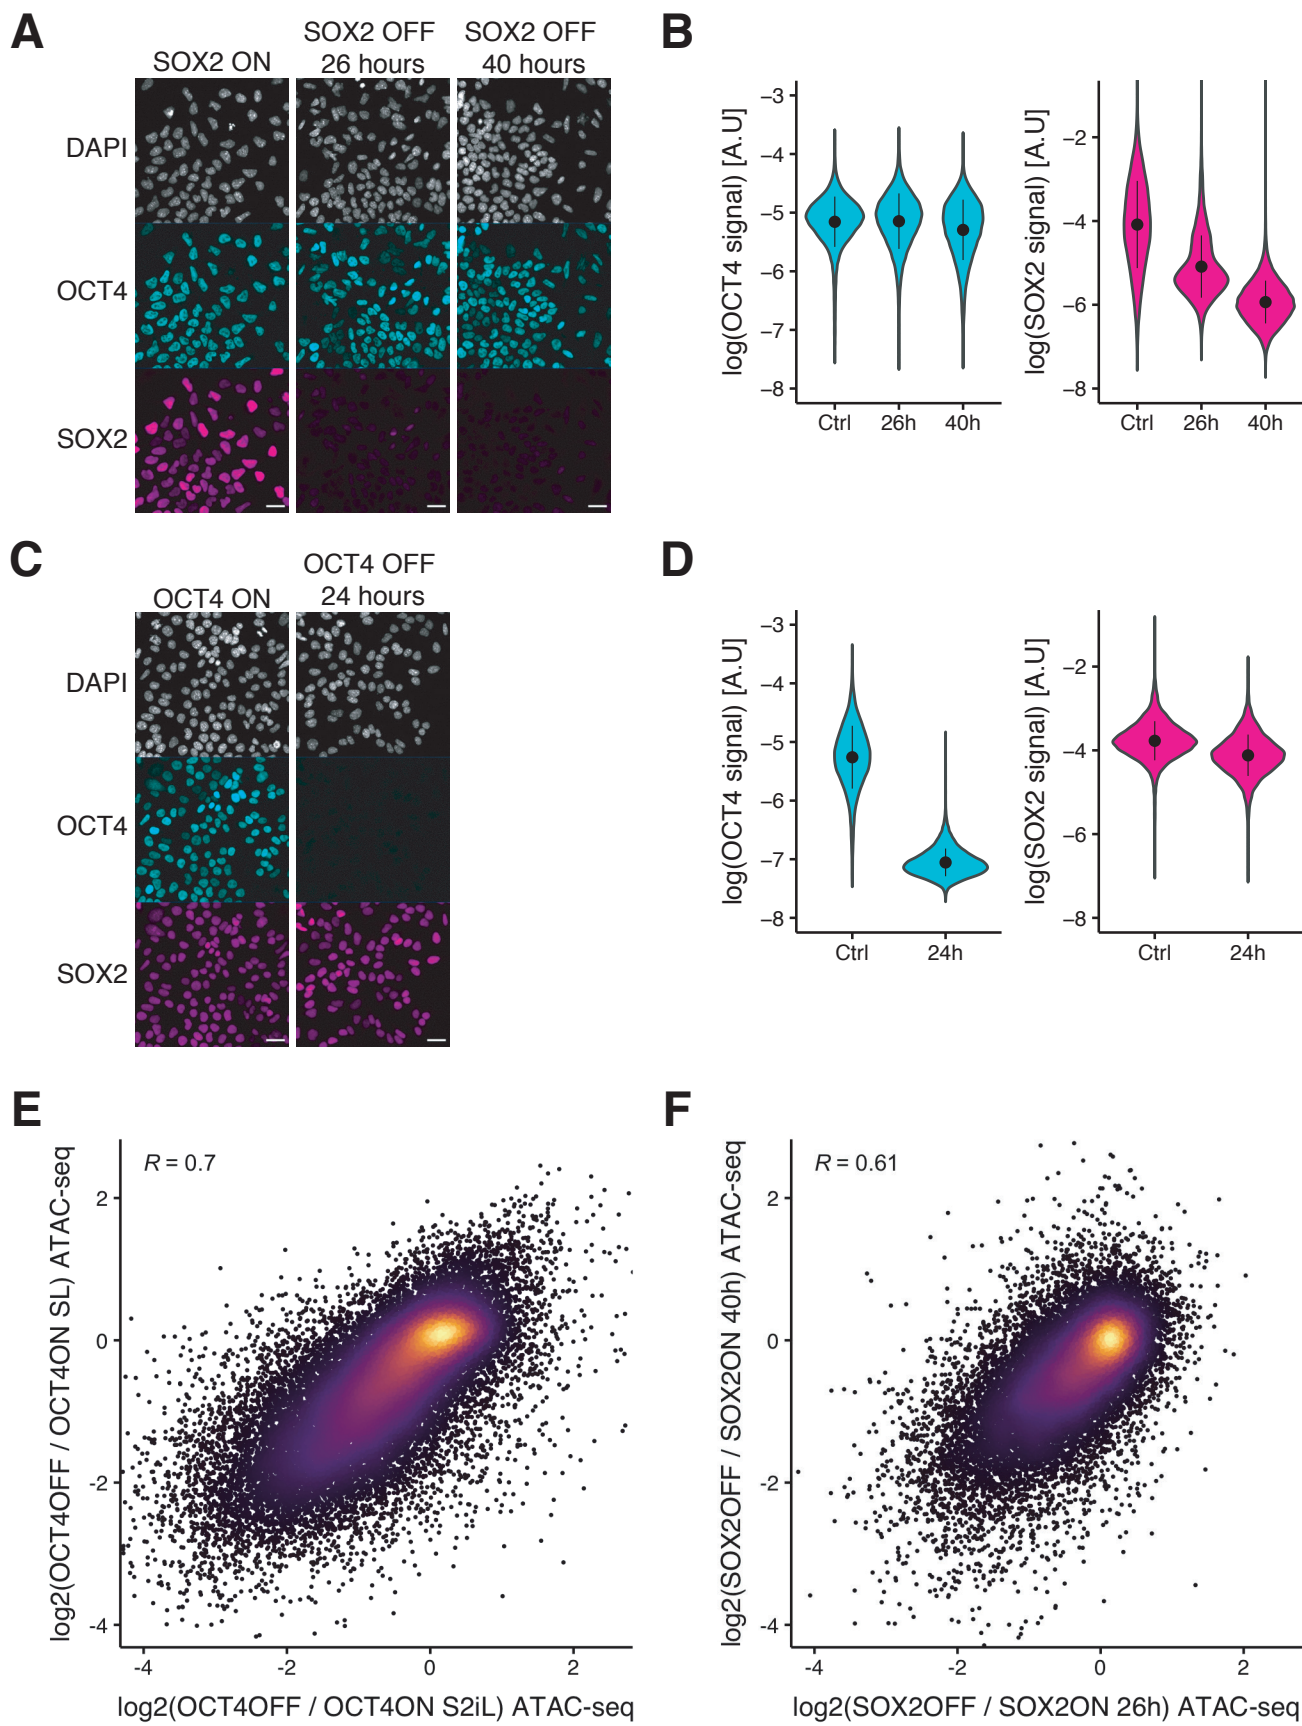

**A**

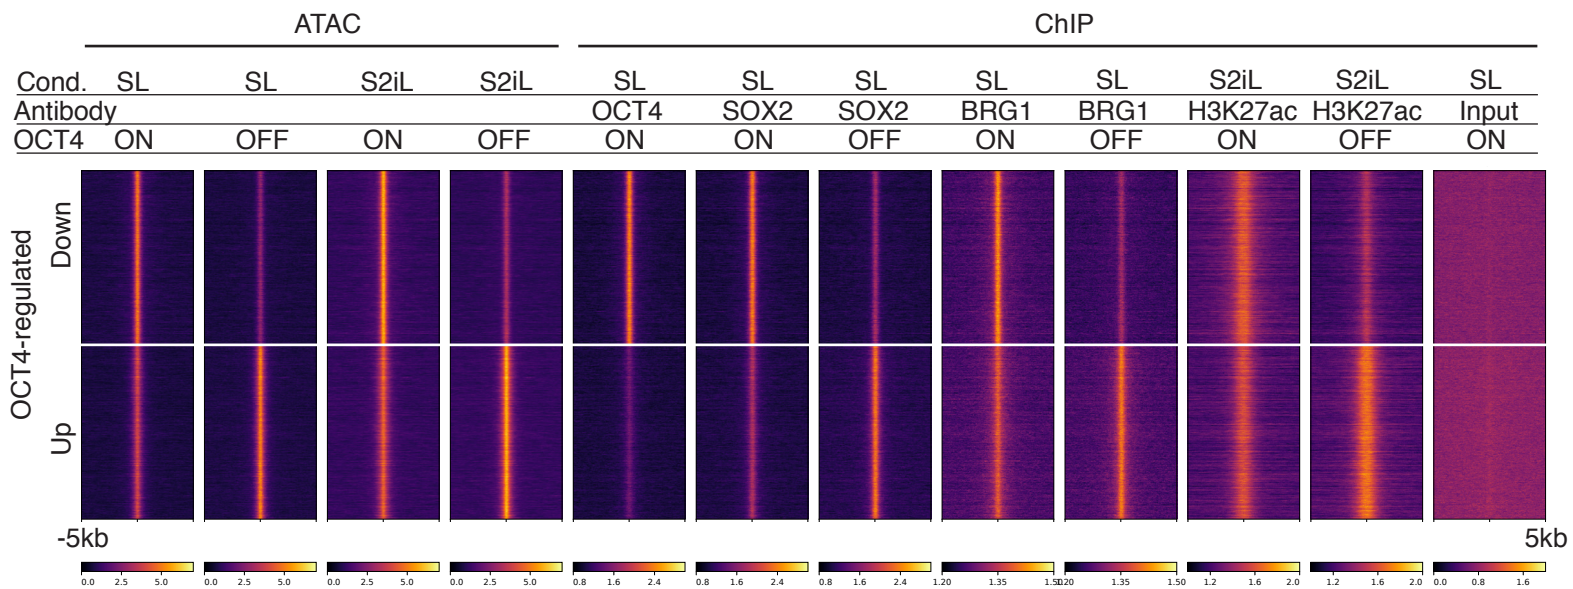

**B**

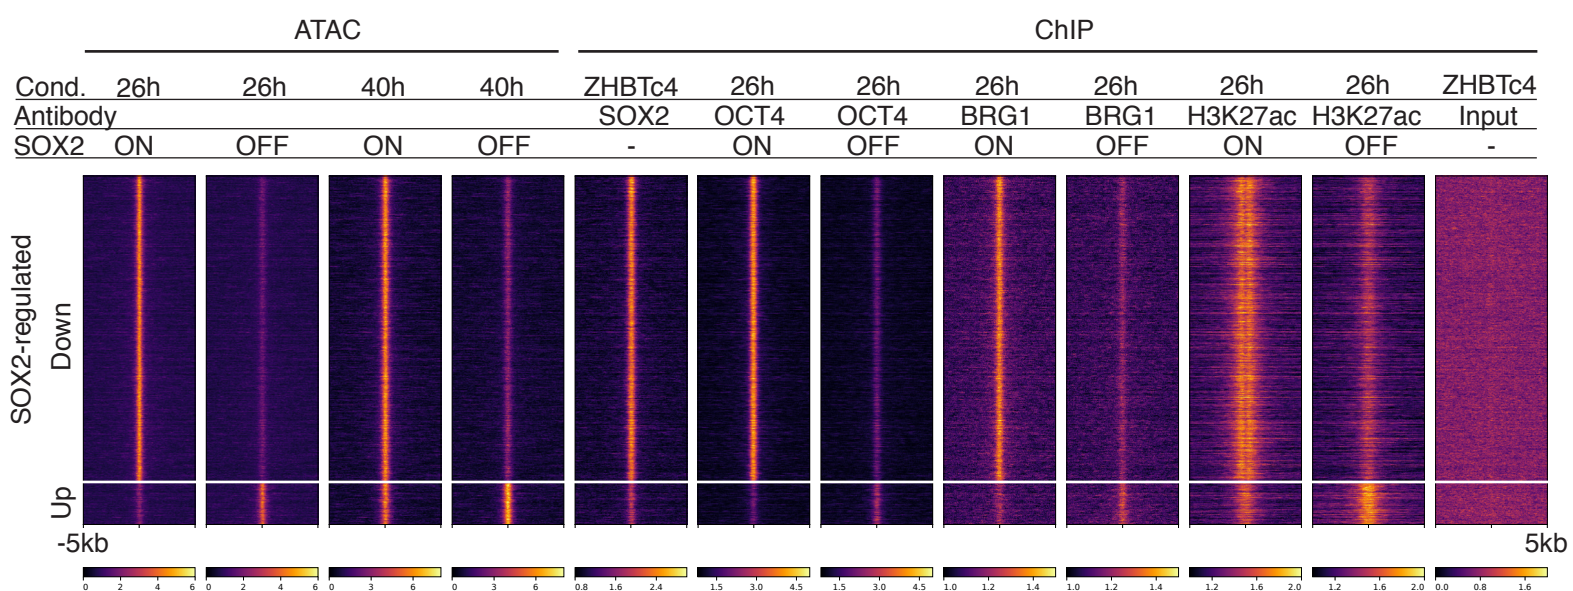

**A**

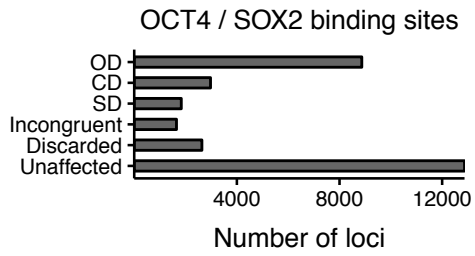

**B**

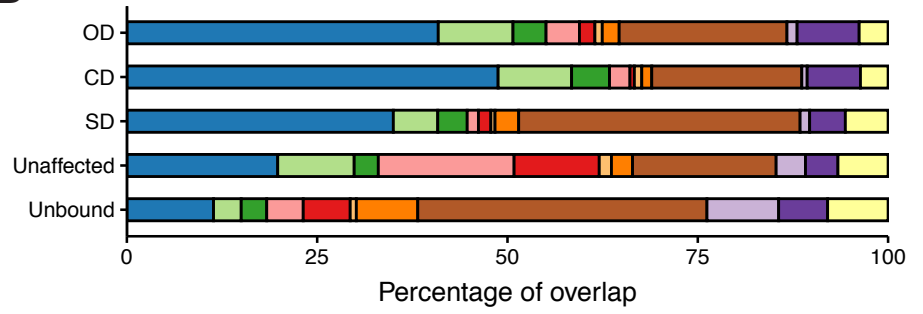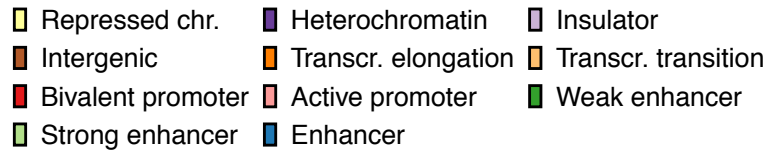

**A**

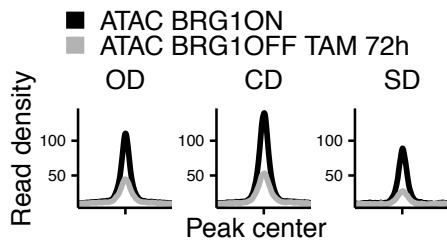

**B**

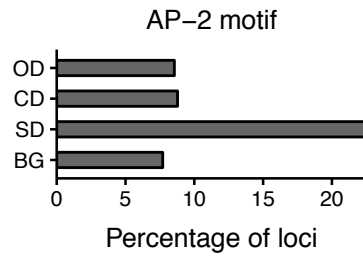

**C**

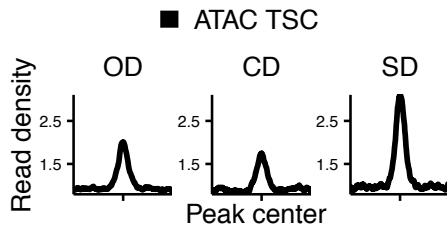

**D**

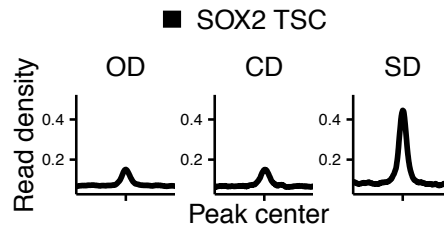

**E**

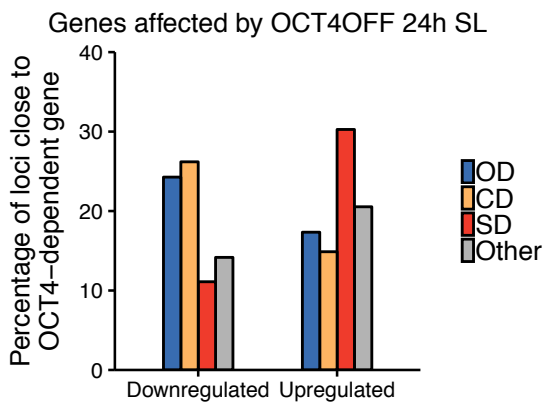

**F**

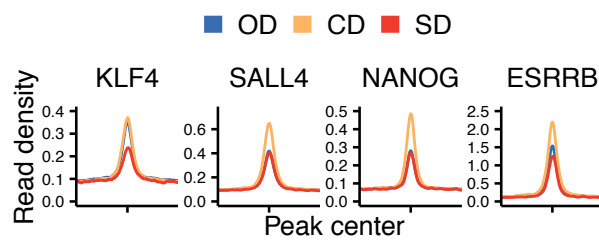

**G**

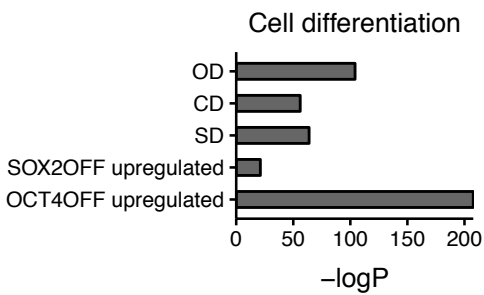

**H**

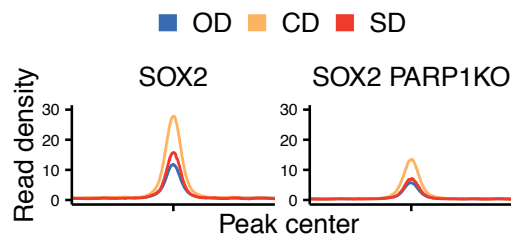

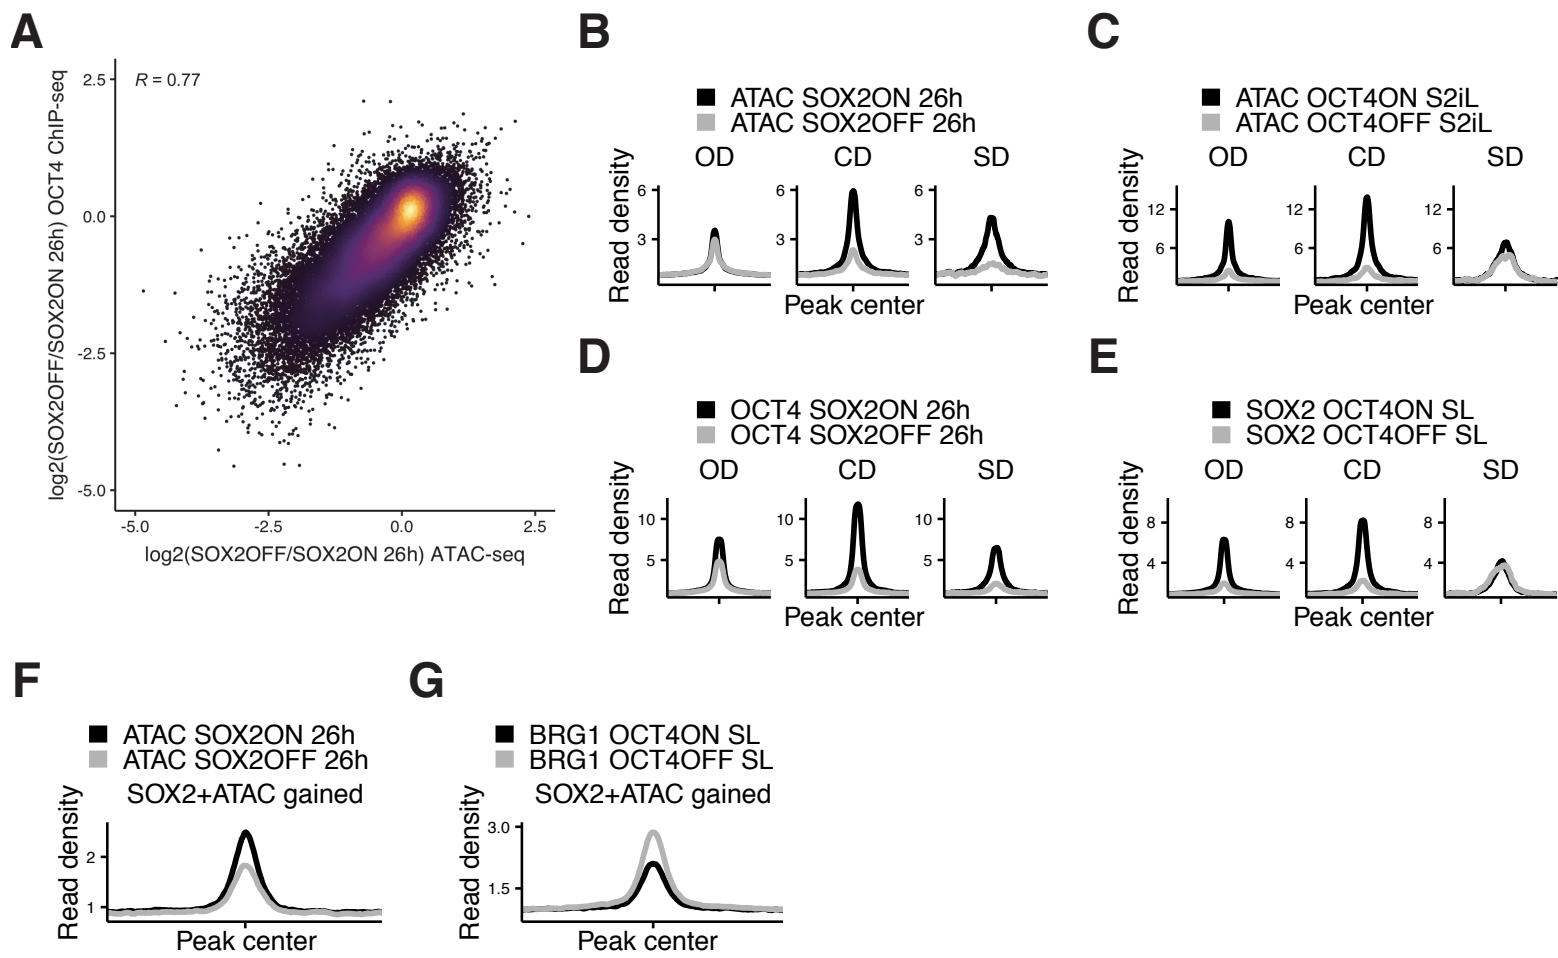



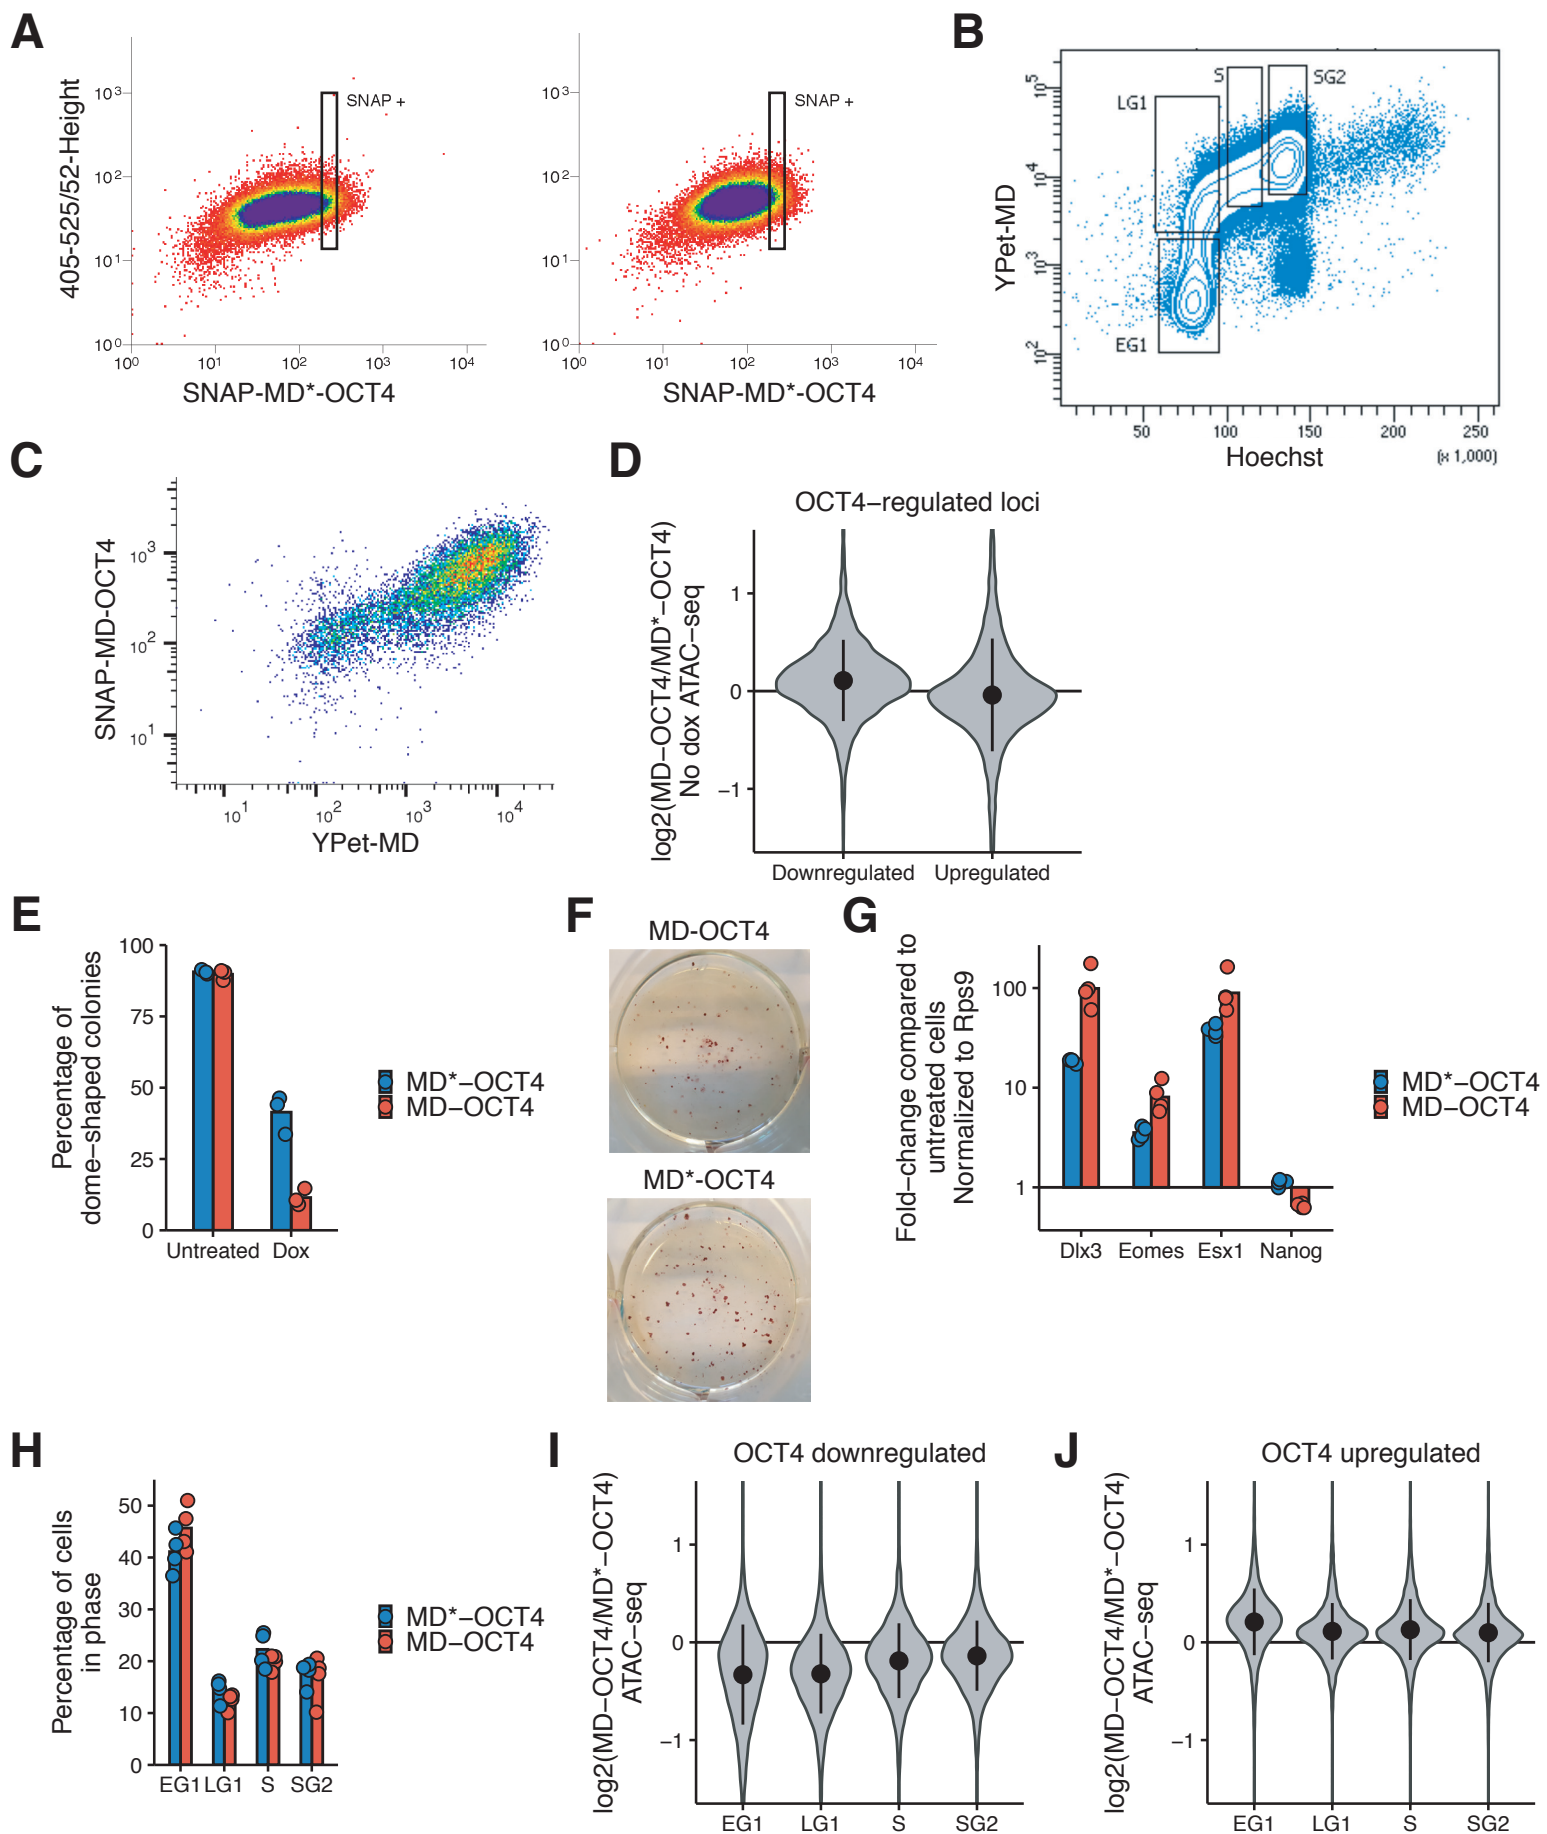

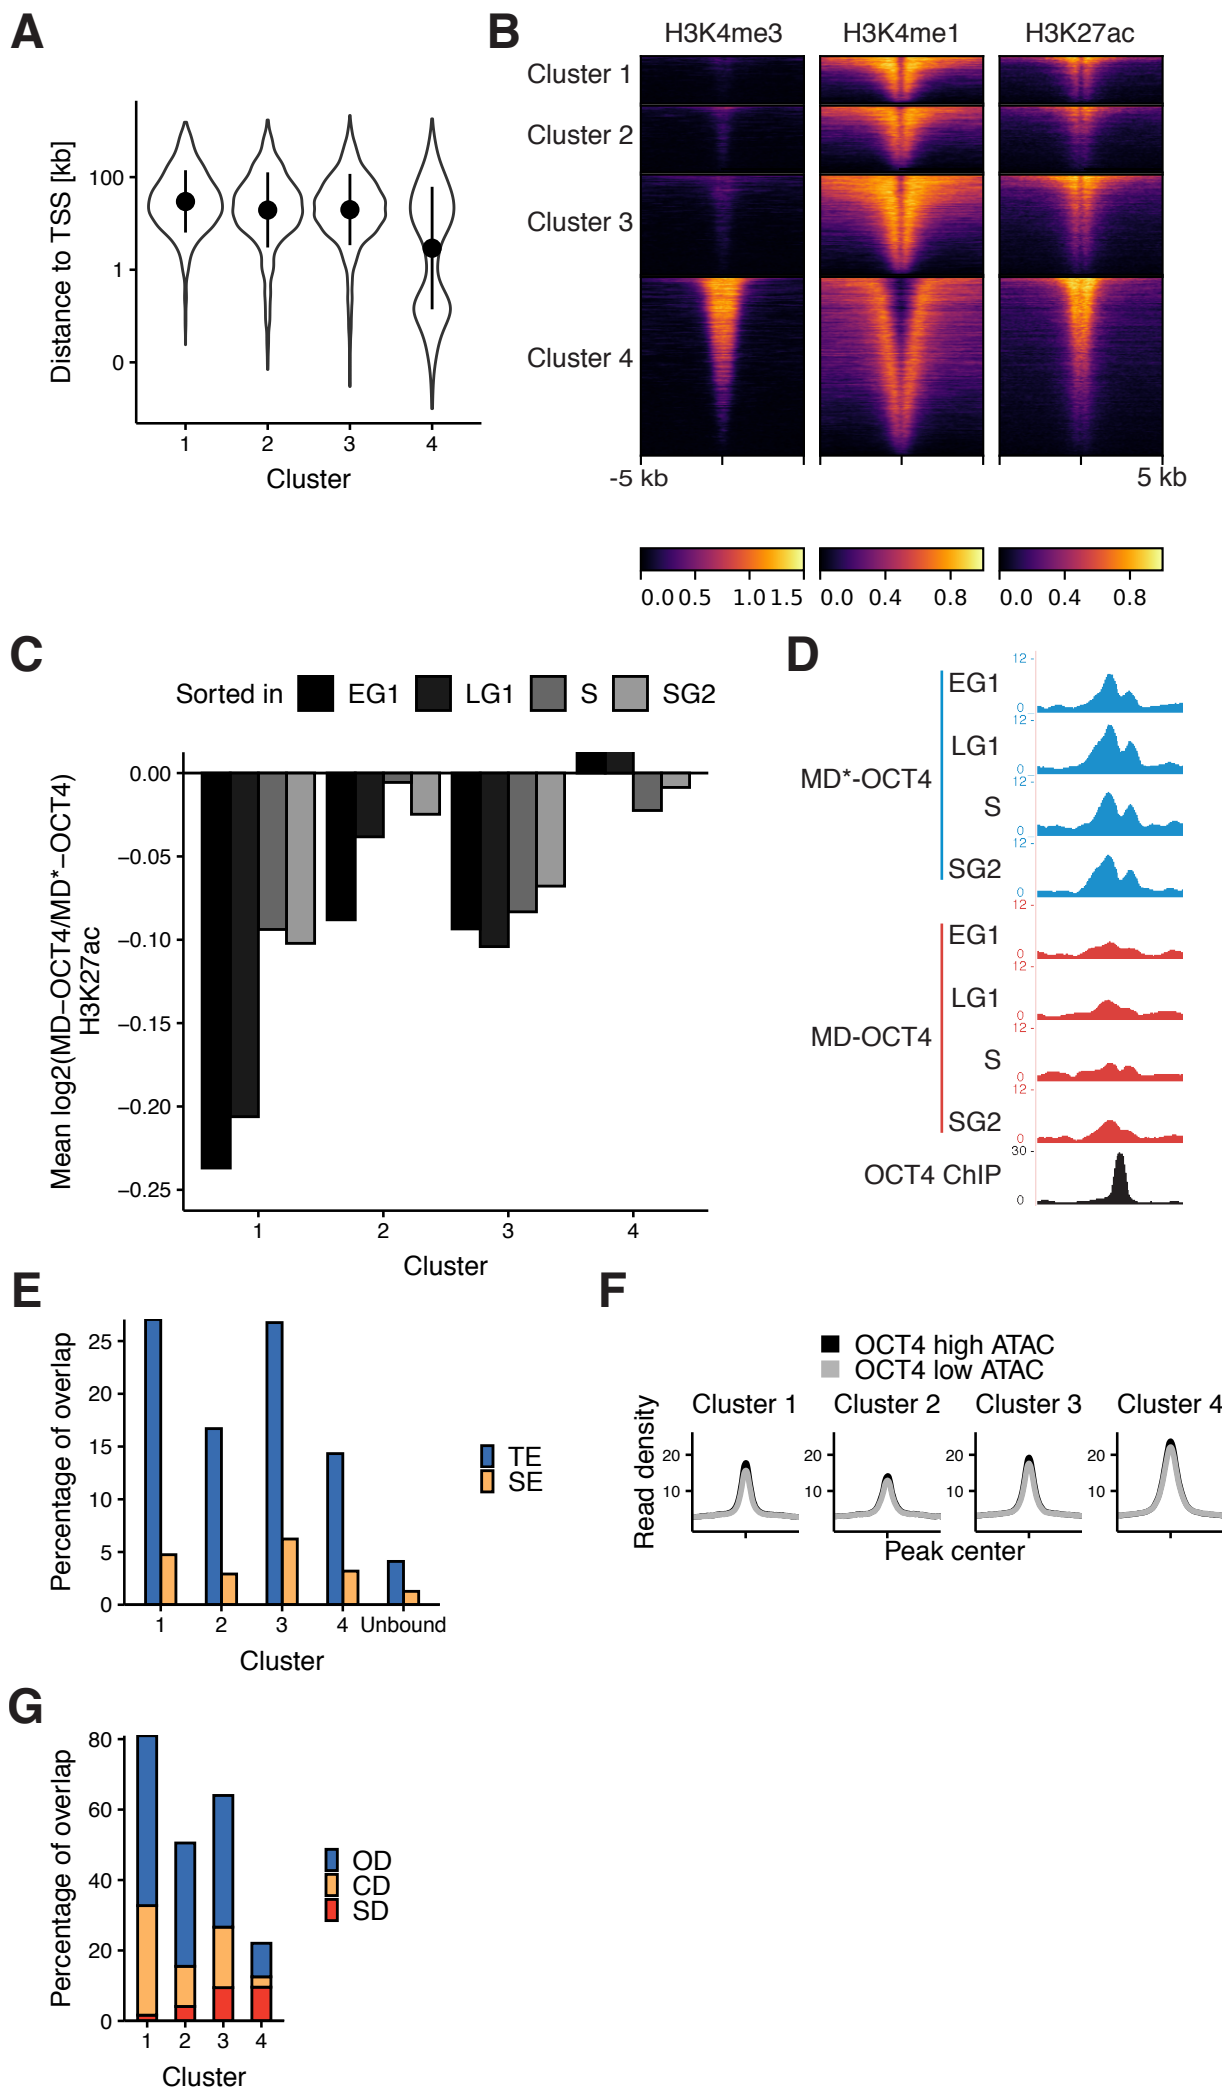

**A**

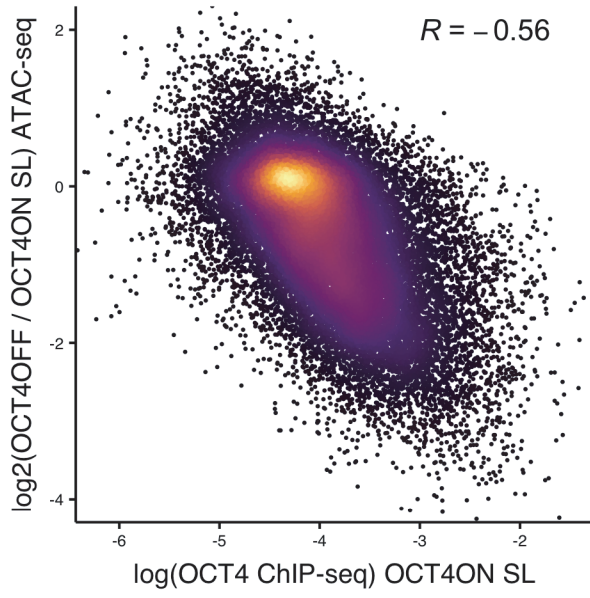

**B**

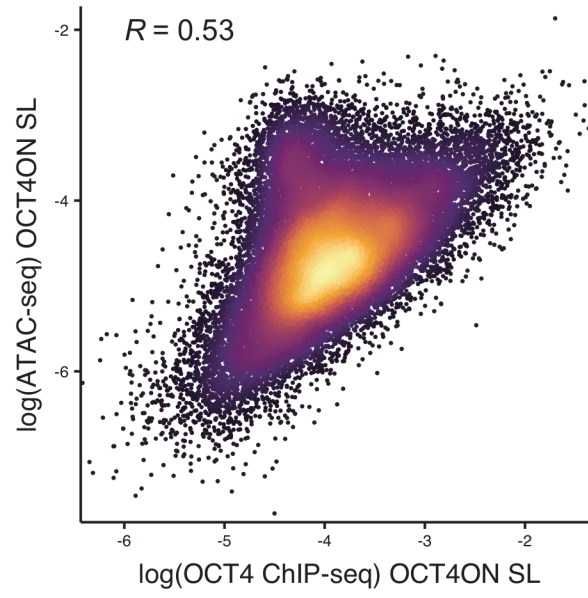

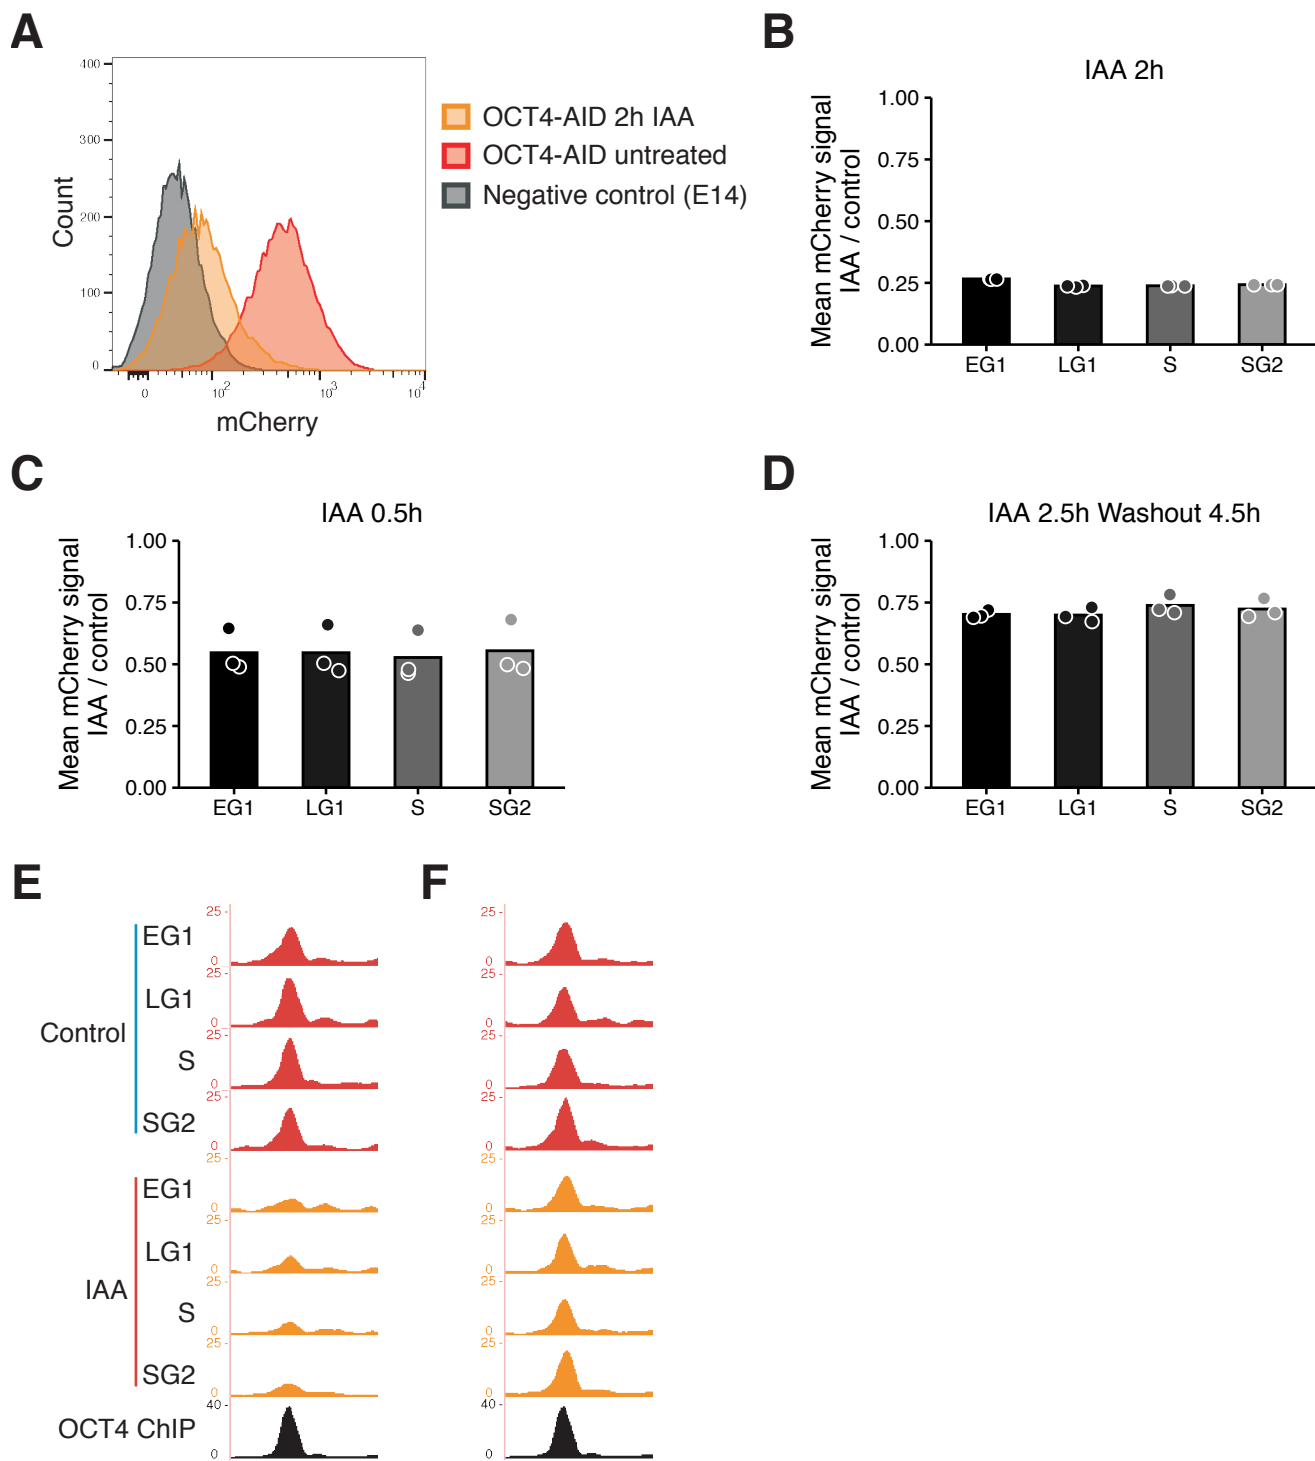







| Experiment | Cell line | Expression construct | Treatment | Cell cycle phase | Antibody | Replicate | Accession | SRA         | SRA        | SRA        | SRA        |
|------------|-----------|----------------------|-----------|------------------|----------|-----------|-----------|-------------|------------|------------|------------|
| ATAC       | ZHBTc4    | -                    | UNT       | -                | -        | 1         | GSE87822  | SRR44137754 | SRR4413775 | SRR4413776 | SRR4413777 |
| ATAC       | ZHBTc4    | -                    | DOX       | -                | -        | 1         | GSE87822  | SRR4413786  | SRR4413787 | SRR4413788 | SRR4413789 |
| ATAC       | ZHBTc4    | -                    | UNT       | -                | -        | 2         | GSE87822  | SRR4413778  | SRR4413779 | SRR4413780 | SRR4413781 |
| ATAC       | ZHBTc4    | -                    | DOX       | -                | -        | 2         | GSE87822  | SRR4413790  | SRR4413791 | SRR4413792 | SRR4413793 |
| ATAC       | ZHBTc4    | -                    | UNT       | -                | -        | 3         | GSE87822  | SRR4413782  | SRR4413783 | SRR4413784 | SRR4413785 |
| ATAC       | ZHBTc4    | -                    | DOX       | -                | -        | 3         | GSE87822  | SRR4413794  | SRR4413795 | SRR4413796 | SRR4413797 |
| ChIP       | ZHBTc4    | -                    | UNT       | -                | BRG1     | 1         | GSE87822  | SRR4413872  | SRR4413873 |            |            |
| ChIP       | ZHBTc4    | -                    | DOX       | -                | BRG1     | 1         | GSE87822  | SRR4413878  | SRR4413879 |            |            |
| ChIP       | ZHBTc4    | -                    | UNT       | -                | BRG1     | 2         | GSE87822  | SRR4413874  | SRR4413875 |            |            |
| ChIP       | ZHBTc4    | -                    | DOX       | -                | BRG1     | 2         | GSE87822  | SRR4413880  | SRR4413881 |            |            |
| ChIP       | ZHBTc4    | -                    | UNT       | -                | BRG1     | 3         | GSE87822  | SRR4413876  | SRR4413877 |            |            |
| ChIP       | ZHBTc4    | -                    | DOX       | -                | BRG1     | 3         | GSE87822  | SRR4413882  | SRR4413883 |            |            |
| ChIP       | ZHBTc4    | -                    | UNT       | -                | SOX2     | 1         | GSE87822  | SRR4413848  | SRR4413849 |            |            |
| ChIP       | ZHBTc4    | -                    | DOX       | -                | SOX2     | 1         | GSE87822  | SRR4413854  | SRR4413855 |            |            |
| ChIP       | ZHBTc4    | -                    | UNT       | -                | SOX2     | 2         | GSE87822  | SRR4413850  | SRR4413851 |            |            |
| ChIP       | ZHBTc4    | -                    | DOX       | -                | SOX2     | 2         | GSE87822  | SRR4413856  | SRR4413857 |            |            |
| ChIP       | ZHBTc4    | -                    | UNT       | -                | SOX2     | 3         | GSE87822  | SRR4413852  | SRR4413853 |            |            |
| ChIP       | ZHBTc4    | -                    | DOX       | -                | SOX2     | 3         | GSE87822  | SRR4413859  | SRR4413859 |            |            |
| ChIP       | ZHBTc4    | -                    | UNT       | -                | OCT4     | 1         | GSE87822  | SRR4413836  | SRR4413837 |            |            |
| ChIP       | ZHBTc4    | -                    | DOX       | -                | OCT4     | 1         | GSE87822  | SRR4413842  | SRR4413843 |            |            |
| ChIP       | ZHBTc4    | -                    | UNT       | -                | OCT4     | 2         | GSE87822  | SRR4413838  | SRR4413839 |            |            |
| ChIP       | ZHBTc4    | -                    | DOX       | -                | OCT4     | 2         | GSE87822  | SRR4413844  | SRR4413845 |            |            |
| ChIP       | ZHBTc4    | -                    | UNT       | -                | OCT4     | 3         | GSE87822  | SRR4413840  | SRR4413841 |            |            |
| ChIP       | ZHBTc4    | -                    | DOX       | -                | OCT4     | 3         | GSE87822  | SRR4413846  | SRR4413847 |            |            |
| ChIP       | ZHBTc4    | -                    | UNT       | -                | Input    | 1         | GSE87822  | SRR4413884  | SRR4413885 |            |            |



| Accession | Sample number | Sample name                                                           | Factor  | Cell_line   | Source     |
|-----------|---------------|-----------------------------------------------------------------------|---------|-------------|------------|
| GSE49848  | GSM1208217    | CME186_KLF4_CHIP-SEQ                                                  | KLF4    | ESC         | cistromeDB |
| GSE57700  | GSM2065694    | SALL4-CHIP-IN-WT-OF-SALL-DKO                                          | SALL4   | ESC         | cistromeDB |
| GSE113915 | GSM3123484    | WT_MESC_NANOG                                                         | NANOG   | ESC         | cistromeDB |
| GSE90895  | GSM2417188    | ESC_ESRRB_CHIP-SEQ                                                    | ESRRB   | ESC         | cistromeDB |
| GSE99022  | GSM2630490    | WT_2I_H3K4ME3                                                         | H3K4me3 | ESC         | cistromeDB |
| GSE95781  | GSM2636047    | WT_H3K4ME1                                                            | H3K4me1 | ESC         | cistromeDB |
| GSE72886  | GSM1874094    | MESC_H3K27AC_CHIPSEQ                                                  | H3K27ac | ESC         | cistromeDB |
| GSE111824 | GSM3398593    | WTTS_ATAC_rep1                                                        | ATAC    | TSC         | GEO        |
| GSE51511  | GSM1246722    | Sox2_ChIPseq_ZHBTc4-TSC                                               | SOX2    | TSC         | GEO        |
| GSE74112  | GSM1910641    | PARP-1KO_ESC_Sox2_ChIPseq_Rep1                                        | SOX2    | ESC_PARP1KO | GEO        |
| GSE74112  | GSM1910640    | WT_ESC_Sox2_ChIPseq_Rep1                                              | SOX2    | ESC         | GEO        |
| GSE87819  |               | GSE87819_mESC_BRG1fl_ATAC_72hrTAM_MERGED.DANPOS.bgsub.smooth          | ATAC    | ESC_BRG1fl  | GEO        |
| GSE87819  |               | GSE87819_mESC_BRG1fl_ATAC_UNT_MERGED.DANPOS.bgsub.smooth              | ATAC    | ESC_BRG1fl  | GEO        |
| GSE87821  |               | GSE87821_ZHBTc4.nucRNAseq_DESeq2_Results                              | RNA-seq | ZHBTc4      | GEO        |
| GSE89599  |               | GSE89599_peaks_Asynchronous_ChIP_vs_Input_3rep_qval001_notInBlacklist | SOX2    | E14         | GEO        |
